# Supplementary material for: Hormetic heat stress and HSF-1 induce autophagy to improve survival and proteostasis in C. elegans
Source: PubMed Central journal article supplement (PMC5316864; doi:10.1038/ncomms14337), 2017-02-15
Supplement: ncomms14337-s1.pdf [file ncomms14337-s1.pdf]

## 1. Supplementary Figures and Legends

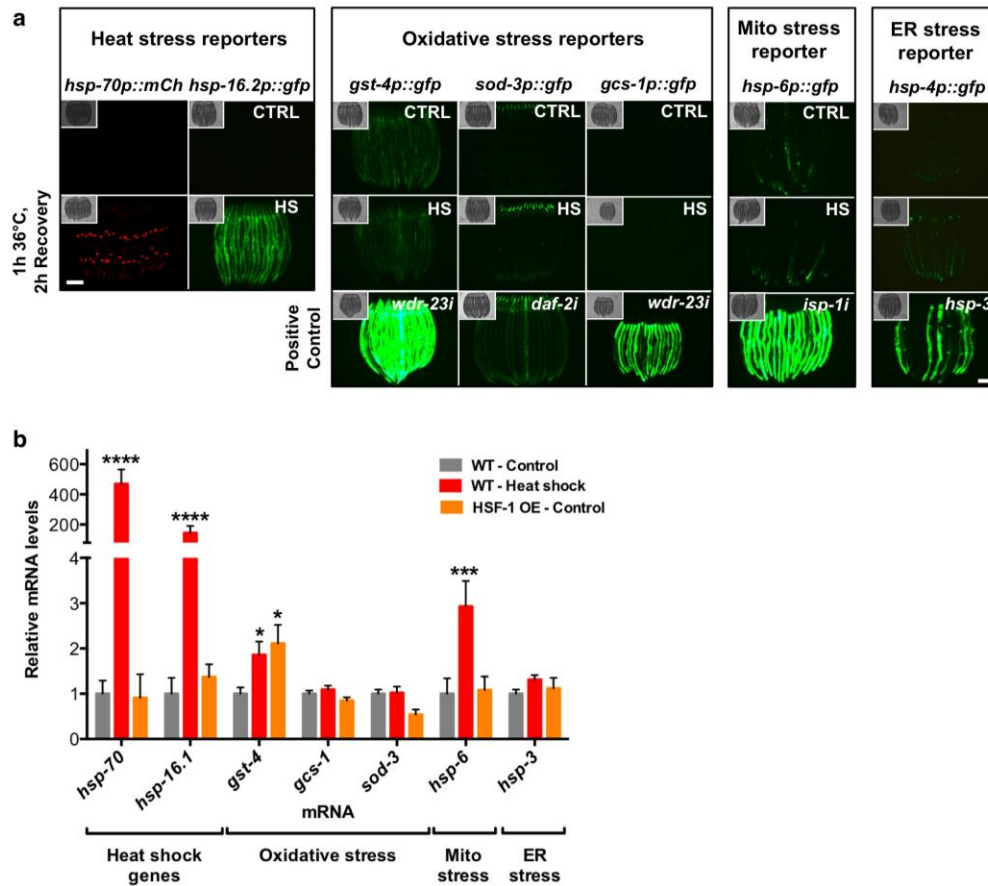

**Supplementary Figure 1. Hormetic heat shock specifically induces the HSR.** (a) mCherry and GFP expression was assessed in the indicated stress reporter strains, which were maintained under control conditions (CTRL, upper row), subjected to 1 h of heat shock at 36°C (HS) followed by 2 h recovery (HS, middle row), or raised on bacteria expressing dsRNA targeting *wdr-23*, *daf-2*, *isp-1*, or *hsp-3* to induce the indicated stress response (lower row). Exposure time: 1000 ms. Scale bar: 200  $\mu$ m. The experiment was performed twice with similar results. Inserts show bright-field images of the same animals. (b) Transcript levels of genes involved in various stress responses in wild-type (WT, N2) and HSF-1–overexpressing (HSF-1 OE) animals maintained under control conditions (CTRL) or in WT animals subjected to heat shock for 1 h at 36°C. Data are the mean  $\pm$  s.e.m. of four biological replicates, each with three technical replicates, and are normalized to the mean expression levels of four housekeeping genes. \* $P < 0.05$ , \*\*\* $P < 0.001$ , \*\*\*\* $P < 0.0001$ , no symbol:  $P > 0.05$  by one-way ANOVA per transcript.

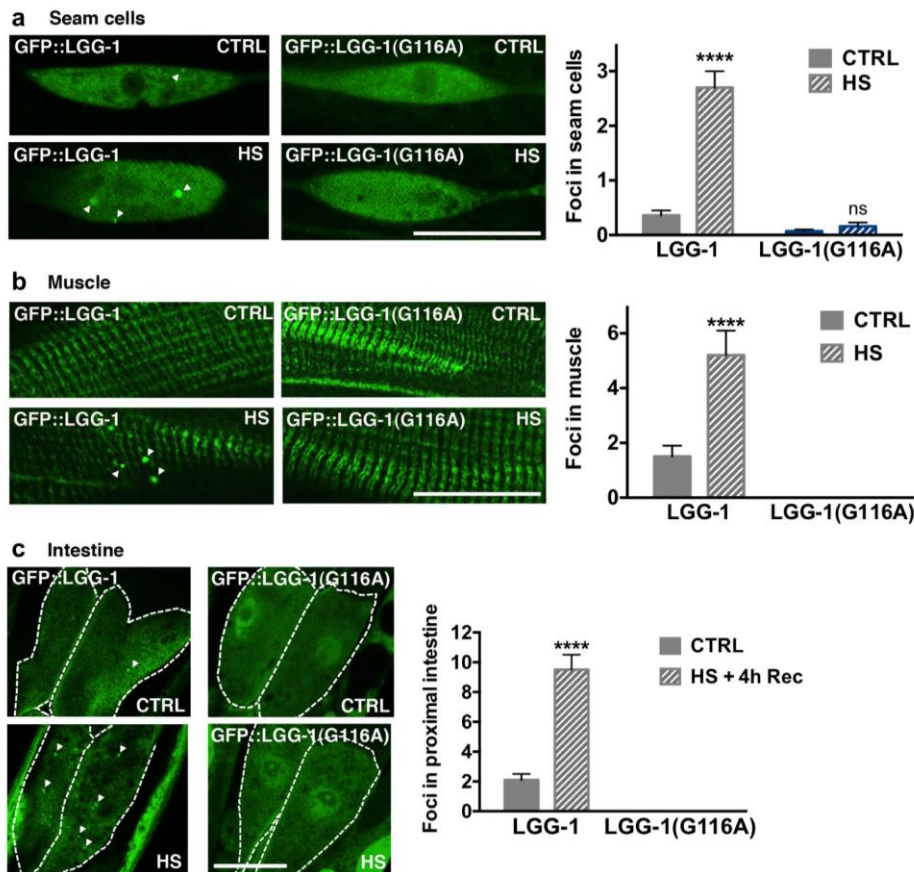

**Supplementary Figure 2. The heat shock-mediated increase in GFP::LGG-1-positive punctae requires LGG-1 lipidation.** GFP::LGG-1/Atg8 punctae were counted on day 1 of adulthood in *C. elegans* expressing *lgg-1p::gfp::lgg-1* (LGG-1) or *lgg-1p::gfp::lgg-1(G116A)* (LGG-1(G116A)) and either maintained under control conditions (CTRL) or subjected to heat shock for 1 h at 36°C (HS) followed by the indicated recovery period (Rec). Punctae were examined in (a) hypodermal seam cells (N = 45-60 cells), (b) body-wall muscle (N=10-11 animals), and (c) proximal intestinal cells (N = 13-14 animals). See also Supplementary Table 4 for a summary of repeat experiments. Error bars indicate s.e.m. Scale bar: 20  $\mu$ m. ns:  $P > 0.05$ , \*\*\*\* $P < 0.0001$  by multiple  $t$ -tests.

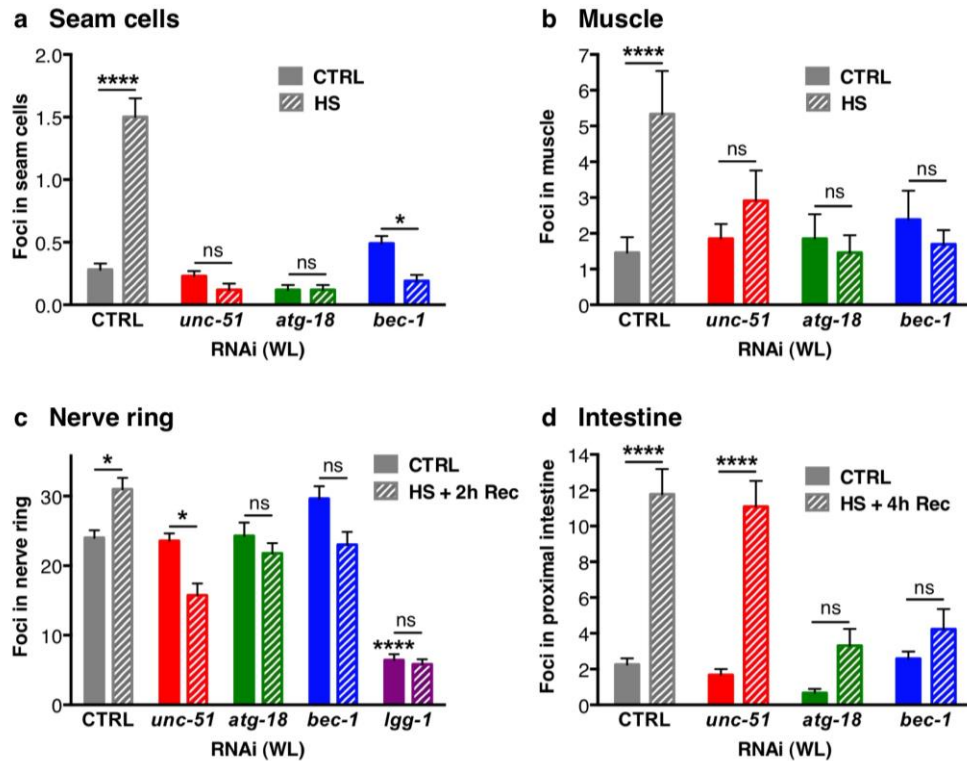

**Supplementary Figure 3. Induction of autophagy by hormetic heat shock requires autophagy genes.** GFP::LGG-1/Atg8 punctae were counted on day 1 of adulthood in *C. elegans* expressing (a,b,d) *lgg-1p::gfp::lgg-1* or (c) *rgef-1p::gfp::lgg-1* maintained under control conditions (CTRL, solid bars) or subjected to heat shock for 1 h at 36°C (HS, striped bars) followed by the indicated recovery period (Rec). Animals were raised from hatching (WL: whole-life RNAi) on control bacteria (empty vector, CTRL) or bacteria expressing dsRNA targeting the autophagy genes *unc-51/ATG1*, *atg-18*, *bec-1/ATG6*, or *lgg-1/ATG8*. Punctae were examined in (a) hypodermal seam cells (N = 64-100 cells), (b) body-wall muscle (N = 11-13 animals), (c) nerve ring neurons (N = 11-13 animals), and (d) intestinal cells (N = 12-13 animals). Although neurons are partially refractory to RNAi, GFP::LGG-1/Atg8 punctae in neurons were reduced after *lgg-1* RNAi, indicating that neurons are at least partially able to process RNAi. Error bars indicate s.e.m. ns:  $P > 0.05$ , \* $P < 0.05$ , \*\*\*\* $P < 0.0001$  by two-way ANOVA. See also Supplementary Table 5 for a summary of additional experiments.

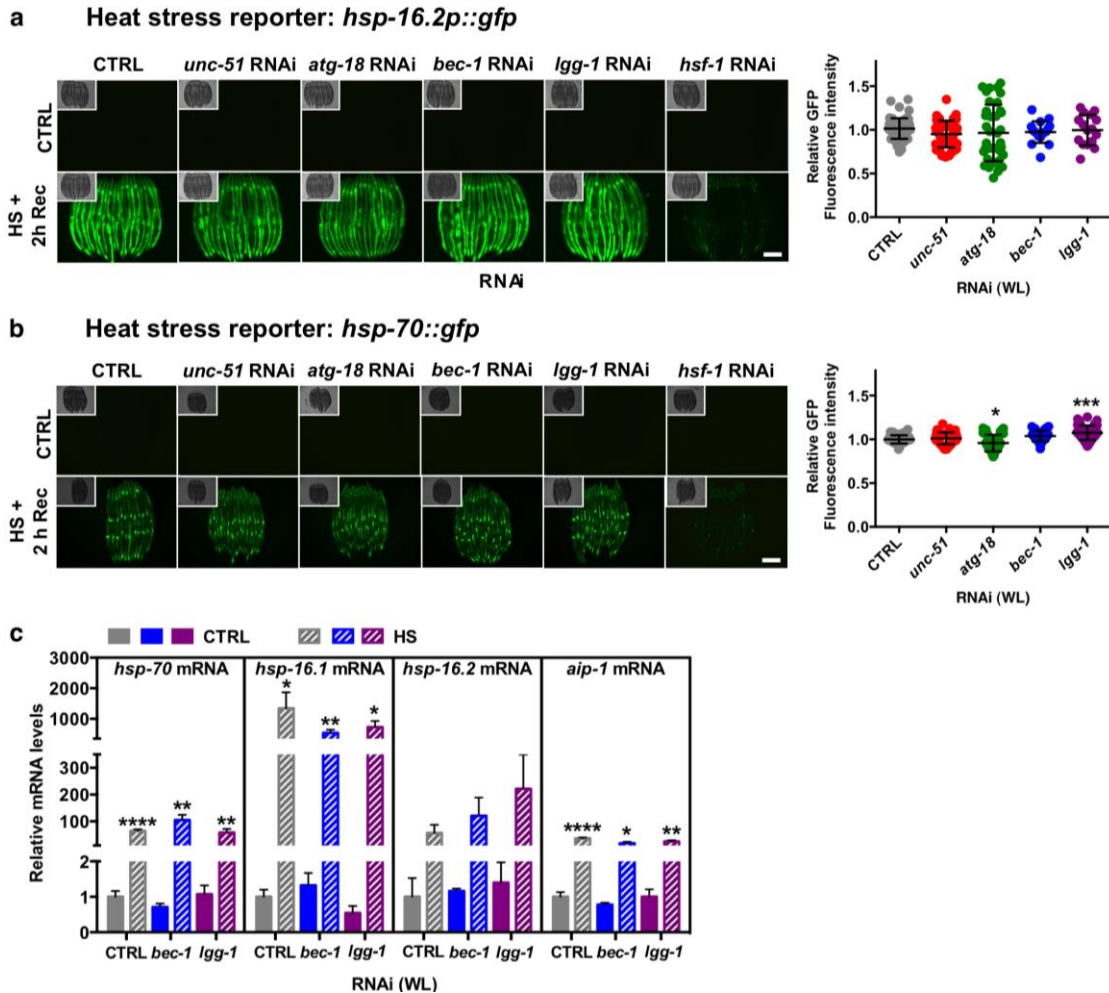

**Supplementary Figure 4. Inhibition of autophagy genes does not impair the HSR.** Induction of the heat shock response was measured in animals raised from hatching (WL: whole-life RNAi) on control bacteria (empty vector, CTRL) or bacteria expressing dsRNA targeting the autophagy genes *unc-51/ATG1*, *atg-18*, *bec-1/ATG6*, *lgg-1/ATG8* or *hsf-1*. **(a,b)** Images of whole animals and quantification of relative GFP fluorescence intensity of animals expressing **(a)** *hsp-16.2p::gfp* or **(b)** *hsp-70p::gfp* on day 1 of adulthood. Animals were maintained under control conditions (CTRL) or subjected to 1 h of heat shock at 36°C (HS) followed by 2 h recovery. Scale bar: 200  $\mu$ m. Data are displayed as the relative fluorescence intensity of after HS compared with CTRL animals and are the mean  $\pm$  s.e.m. of N = 16-59 animals pooled from 2-5 independent experiments. \* $P$  < 0.05, \*\*\* $P$  < 0.001 by one-way ANOVA. **(c)** Transcript levels of genes involved in the heat shock response in wild-type (N2) animals maintained under control conditions (CTRL) or subjected to heat shock for 1 h at 36°C (HS). Data are the mean  $\pm$  s.e.m. of three biological replicates, each with three technical replicates, and are normalized to the mean expression levels of two housekeeping genes. Error bars indicate s.e.m. No symbol:  $P$  > 0.05, \* $P$  < 0.05, \*\* $P$  < 0.01, \*\*\*\* $P$  < 0.0001 by multiple  $t$ -test.

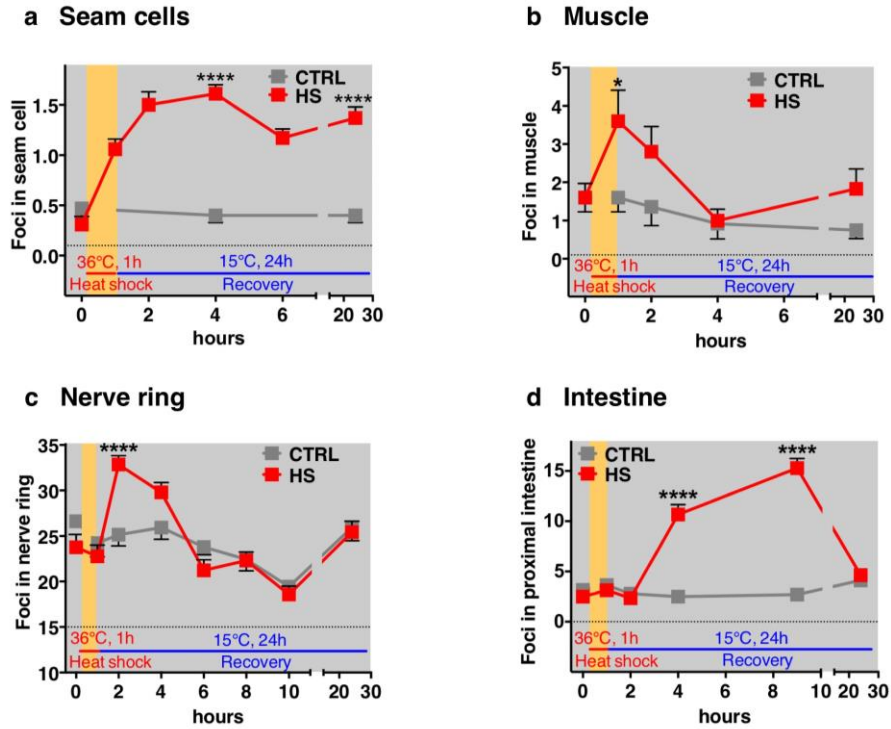

**Supplementary Figure 5. Hormetic heat shock induces autophagy with distinct, tissue-specific kinetics.** GFP::LGG-1/Atg8 punctae were counted on day 1 of adulthood in *C. elegans* expressing (a,b,d) *lgg-1p::gfp::lgg-1* or (c) *rgef-1p::gfp::lgg-1* maintained under control conditions (CTRL, solid bars) or subjected to heat shock for 1 h at 36°C (HS, striped bars) followed by a recovery period. Punctae were examined in (a) hypodermal seam cells (N = 64-116 cells), (b) body-wall muscle (N = 10-12 animals), (c) nerve ring neurons (N = 12-14 animals), and (d) intestinal cells (N = 14-17 animals). Error bars indicate s.e.m. \* $P < 0.05$ , \*\*\*\* $P < 0.0001$  by two-way ANOVA (time-course for muscle, nerve ring, and intestine) and Student's *t*-test (single time points in hypodermal seam cells). See also Supplementary Table 3 for a summary of additional experiments.

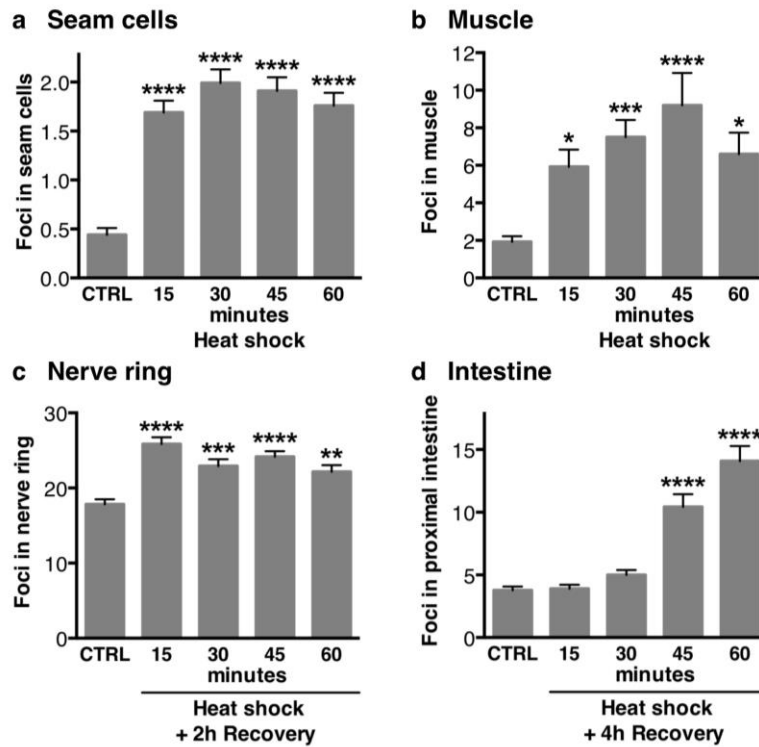

**Supplementary Figure 6. The duration of hormetic heat shock differentially affects tissue-specific induction of autophagy.** GFP::LGG-1/Atg8 punctae were counted on day 1 of adulthood in *C. elegans* expressing (a,b,d) *lgg-1p::gfp::lgg-1* or (c) *rgef-1p::gfp::lgg-1* maintained under control conditions (CTRL, solid bars) or subjected to 15, 30, 45, or 60 min of heat shock at 36°C followed by the indicated recovery period. Punctae were examined at the indicated recovery times in (a) hypodermal seam cells (N = 75-96 cells), (b) body-wall muscle (N = 10-12 animals), (c) nerve ring neurons (N = 12-13 animals), and (d) intestinal cells (N = 11-13 animals). Error bars indicate s.e.m. \* $P < 0.05$ , \*\* $P < 0.01$ , \*\*\* $P < 0.001$ , \*\*\*\* $P < 0.0001$  by one-way ANOVA. See also Supplementary Table 6 for a summary of additional experiments.

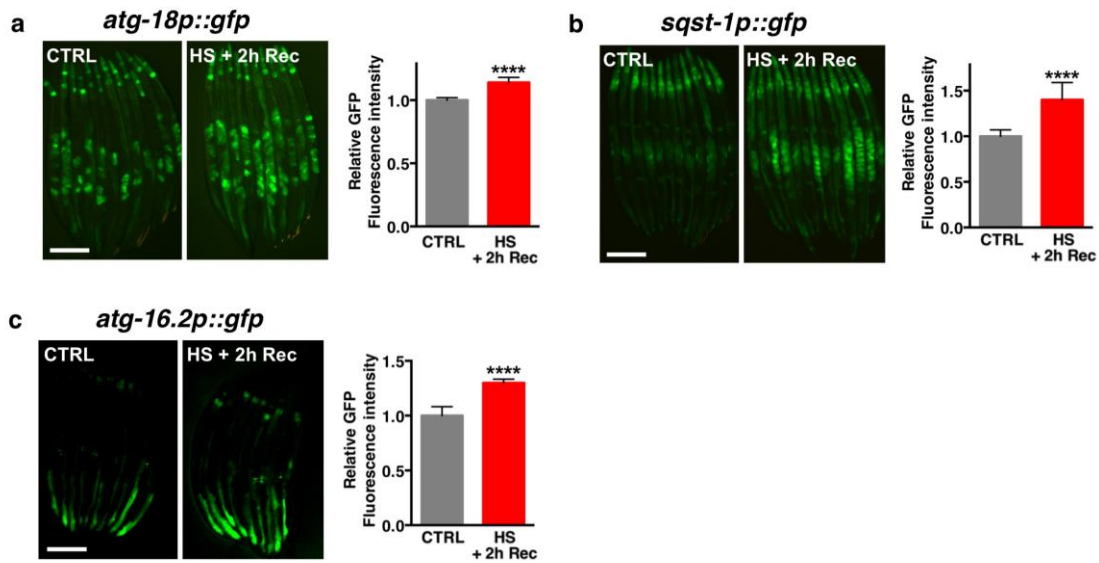

**Supplementary Figure 7. Hormetic heat shock induces transcriptional autophagy reporters.** Relative GFP fluorescence intensity was assessed on day 1 of adulthood in animals expressing (a) *atg-18p::gfp*, (b) *sqst-1p::gfp*, and (c) *atg-16.2p::gfp* and maintained under control conditions (CTRL) or subjected to 1 h of heat shock 36°C (HS) followed by 2 h recovery (Rec). Scale bar: 200  $\mu$ m. Error bars indicate s.e.m. of N=10-13 animals. \* $P < 0.05$ , \*\*\*\* $P < 0.0001$  by Student's *t*-test. The experiments were performed at least three times with similar results.

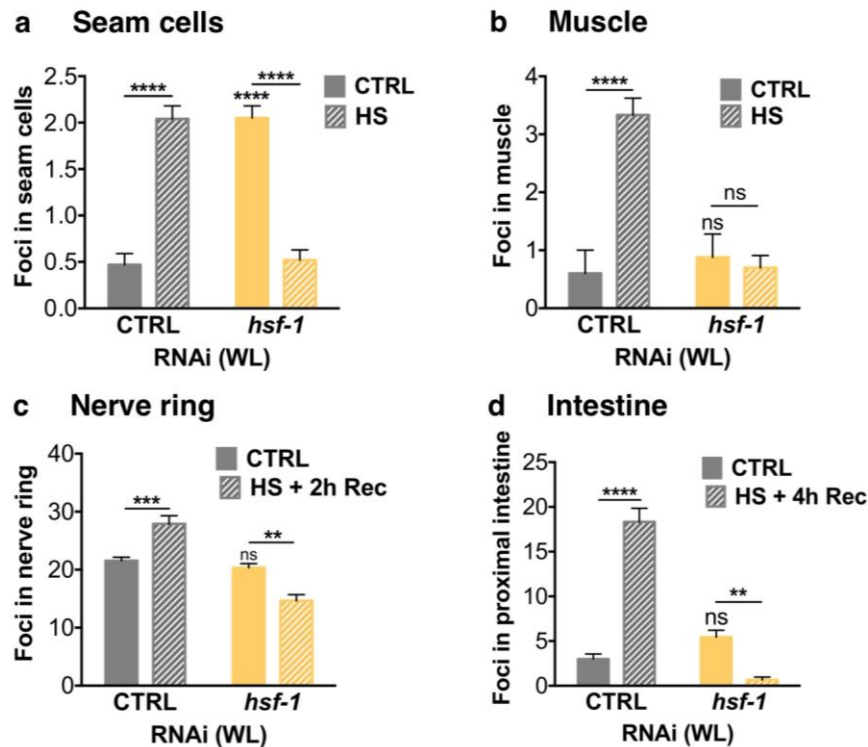

**Supplementary Figure 8. Reduction of *hsf-1* limits autophagy induction in most tissues.** GFP::LGG-1/Atg8 punctae were counted on day 1 of adulthood in *C. elegans* expressing (a,b,d) *lgg-1p::gfp::lgg-1* or (c) *rgef-1p::gfp::lgg-1* maintained under control conditions (CTRL, solid bars) or subjected to heat shock for 1 h at 36°C (HS, striped bars) followed by the indicated recovery period (Rec). Animals were raised from hatching (WL: whole-life RNAi) on control bacteria (empty vector, CTRL) or bacteria expressing dsRNA targeting *hsf-1*. Punctae were examined in (a) hypodermal seam cells (N = 47-57 cells), (b) body-wall muscle (N = 8-10 animals), (c) nerve ring neurons (N = 11-12 animals), and (d) intestinal cells (N = 12-13 animals). Hypodermal seam cells were distinct from the other tissues, since *hsf-1* reduction increased the number of GFP::LGG-1/Atg8-positive punctae under control conditions in this tissue. This could be due to a block or an induction of autophagy in these specialized cells. Further experiments (e.g., flux assays with bafilomycin A) will be necessary to fully characterize autophagy activity in individual tissues in response to *hsf-1* RNAi and hormetic heat shock. Error bars indicate s.e.m. ns:  $P > 0.05$ , \* $P < 0.05$ , \*\*\*\* $P < 0.0001$  by two-way ANOVA. See also Supplementary Table 5 for a summary of repeat experiments.



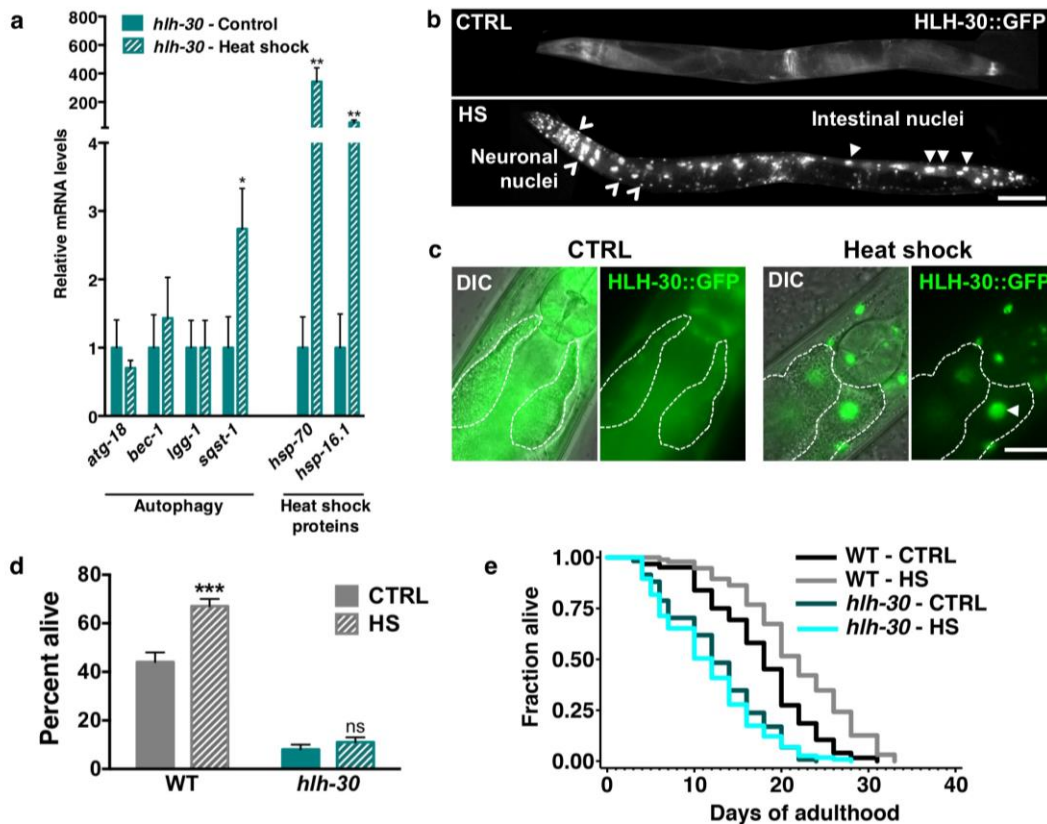

**Supplementary Figure 9. Heat shock engages the helix-loop-helix transcription factor HLH-30.** (a) Transcript levels of autophagy genes in *hlh-30(tm1978)* mutants maintained under control conditions or subjected to heat shock for 1 h at 36°C. Data are the mean  $\pm$  s.e.m. of three biological replicates, each with three technical replicates, and are normalized to the mean expression levels of two housekeeping genes. Error bars indicate s.e.m. \* $P < 0.05$ , \*\* $P < 0.01$ , no symbol:  $P > 0.05$  by multiple  $t$ -tests. (b,c) Nuclear localization of HLH-30::GFP in (b) whole animals and (c) proximal intestinal cells and terminal pharyngeal bulb visualized by fluorescence microscopy on day 1 of adulthood. Animals expressed HLH-30::GFP and were maintained under control conditions (CTRL) or subjected to heat shock for 1 h at 36°C (HS). Outlines show proximal intestinal cells, closed arrowheads point to intestinal nuclei, and open arrowheads point to neuronal nuclei. Scale bar: 20  $\mu$ m. (d) Survival of wild-type (WT, N2) animals and *hlh-30(tm1978)* mutants maintained under control conditions (CTRL, solid bars) or subjected to heat shock for 30 min at 36°C (HS, striped bars) on day 1 of adulthood followed by incubation for 8 h at 36°C on day 5 of adulthood (N = 93–112 animals,  $n = 4$  plates). See Supplementary Table 9 for details of repeat experiments. Error bars indicate s.e.m. ns:  $P > 0.05$ , \*\*\* $P < 0.001$ , \*\*\*\* $P < 0.0001$  by two-way ANOVA. (e) Lifespan analysis of WT (N2) animals and *hlh-30(tm1978)* mutants maintained under control conditions (CTRL) or subjected to heat shock for 1 h at 36°C (HS) on day 1 of adulthood. WT-CTRL animals (17.6 days) compared to WT-HS animals (21.7 days):  $P < 0.0001$ , *hlh-30(tm1978)*-CTRL animals (12.5 days) compared to *hlh-30(tm1978)*-HS (11.6 days):  $P = 0.3$ . See Supplementary Table 10 for details of lifespan analyses and replicate experiments.

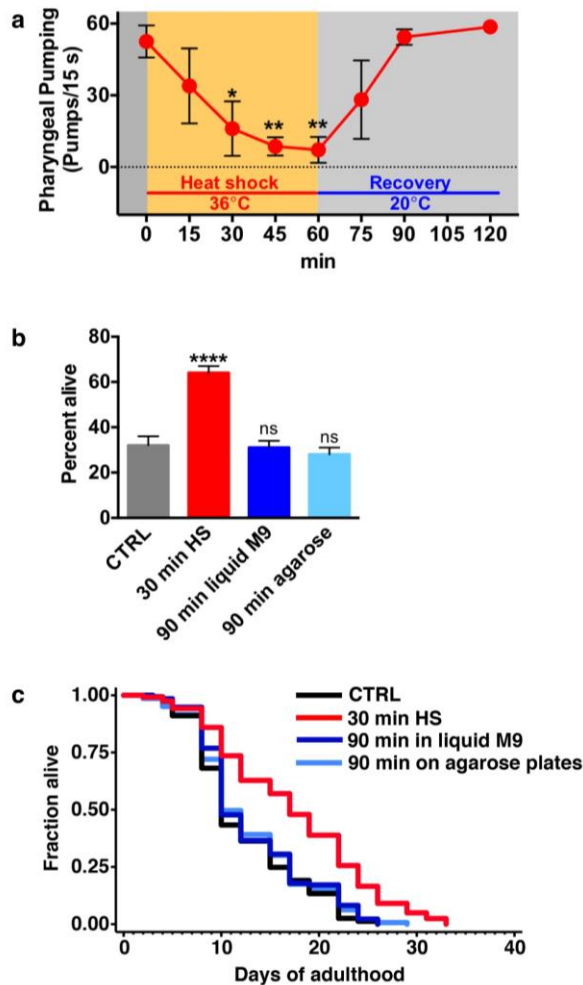

**Supplementary Figure 10. Short-term decrease in food intake does not affect stress resistance or lifespan.** (a) Pharyngeal pumping of wild-type (WT, N2) animals was quantified on day 1 of adulthood before and after heat shock at 36°C and subsequent recovery at 20°C (N = 12–16 animals per time point). Error bars indicate s.d. \*P < 0.05, \*\*P < 0.01, no symbol: P > 0.05 by one-way ANOVA compared to 0 min time point. This experiment was repeated three times with similar results. (b) Survival of WT (N2) animals maintained under control conditions (CTRL), subjected to heat shock for 1 h at 36°C (HS), or subjected to 90 min of food deprivation by incubating animals in liquid M9 medium or for 90 min on agarose plates without food on day 1 of adulthood and then incubated for 7 h at 36°C on day 3 of adulthood (N = 86–89 animals, n = 4 plates). Error bars indicate s.e.m. ns: P > 0.05, \*\*\*\*P < 0.0001 by one-way ANOVA. See Supplementary Table 1 for details of replicate experiments. (c) Lifespan analysis of WT (N2) animals maintained under control conditions (CTRL) or subjected to heat shock for 1 h at 36°C (HS), or subjected to 90 min of food deprivation by incubating animals in liquid M9 media or on agarose plates without food on day 1 of adulthood. WT-CTRL animals (12.4 days, N = 157) compared to WT-HS animals (17.4 days, N = 131): P < 0.0001, compared to WT-90 min in liquid M9 (13.1 days, N = 134) P = 0.2, compared to WT-90 min on agarose plates (12.9 days, N = 143) P = 0.3. See Supplementary Table 2 for details of lifespan analyses and replicate experiments.

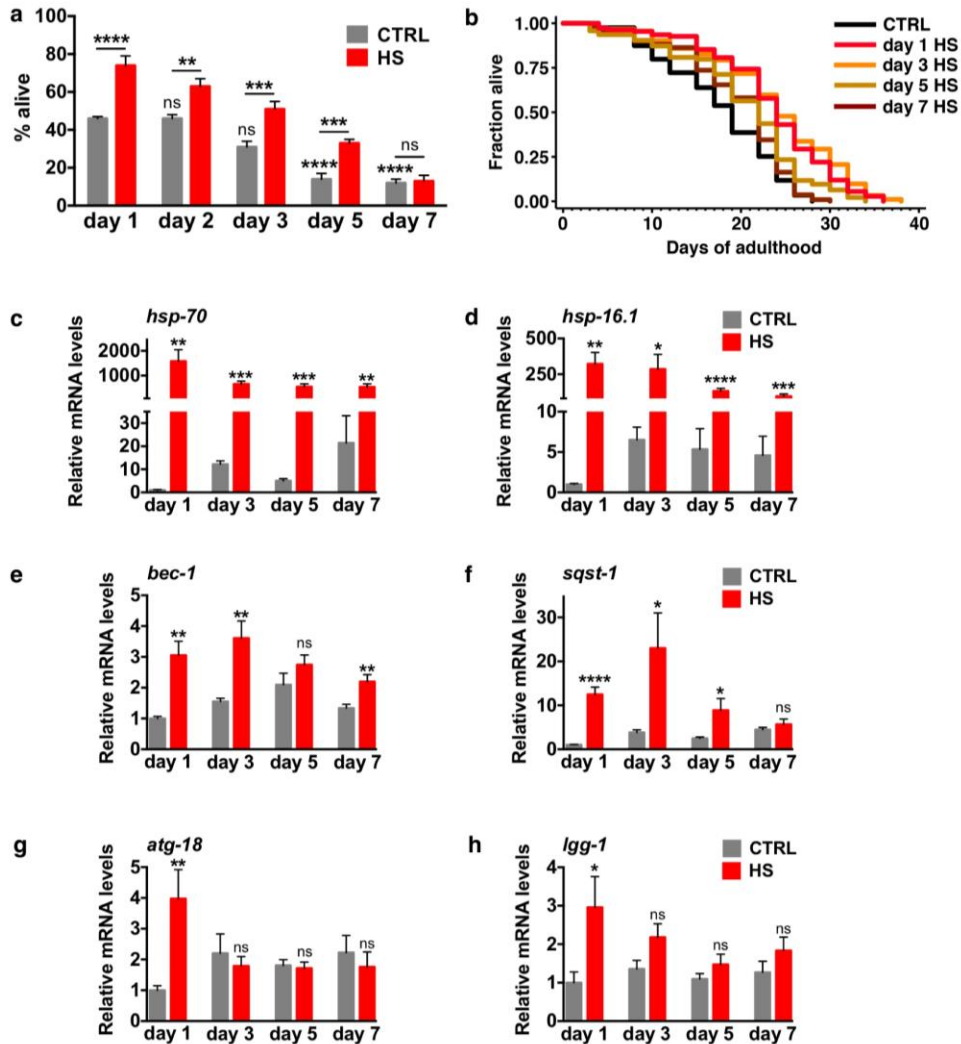

**Supplementary Figure 11. Effects of hormetic heat shock in *C. elegans* at different ages.** (a) Survival of wild-type (WT, N2) animals maintained under control conditions (CTRL) or subjected to heat shock for 1 h at 36°C (HS) on day 1, 2, 3, 5, or 7 of adulthood followed by incubation for 7 h at 36°C two days later (N = 75–133 animals, n = 4 plates). Error bars indicate s.e.m. \*\* $P < 0.01$ , \*\*\* $P < 0.001$ , \*\*\*\* $P < 0.0001$  by two-way ANOVA. See Supplementary Table 1 for details of replicate experiments. (b) Lifespan analysis of WT animals maintained under control conditions (CTRL) or subjected to heat shock for 1 h at 36°C (HS) on day 1, 3, 5, or 7 of adulthood. WT-CTRL animals (17.7 days, N = 119) compared to WT-HS, d1 animals (23.4 days, N = 109):  $P < 0.0001$ , compared to WT-HS d3 (23.6 days, N = 92)  $P < 0.0001$ , compared to WT-HS d5 (20.3 days, N = 94), compared to WT-HS d7 (19.6 days, N = 110)  $P = 0.04$ . See Supplementary Table 2 for details of lifespan analyses and replicate experiments. (c–h) Transcript levels of (c) *hsp-70*, (d) *hsp-16.1*, (e) *bec-1/ATG6*, (f) *sqst-1*, (g) *atg-18*, and (h) *lgg-1/ATG8* in WT animals maintained under control conditions (CTRL) or subjected to heat shock for 1 h at 36°C (HS) on day 1, 3, 5, or 7 of adulthood. Data are the mean  $\pm$  s.e.m. of three biological replicates, each with three technical replicates, and are normalized to the mean expression levels of two housekeeping genes. ns:  $P > 0.05$ , \* $P < 0.05$ , \*\* $P < 0.01$ , \*\*\* $P < 0.001$ , \*\*\*\* $P < 0.0001$  by multiple *t*-tests.

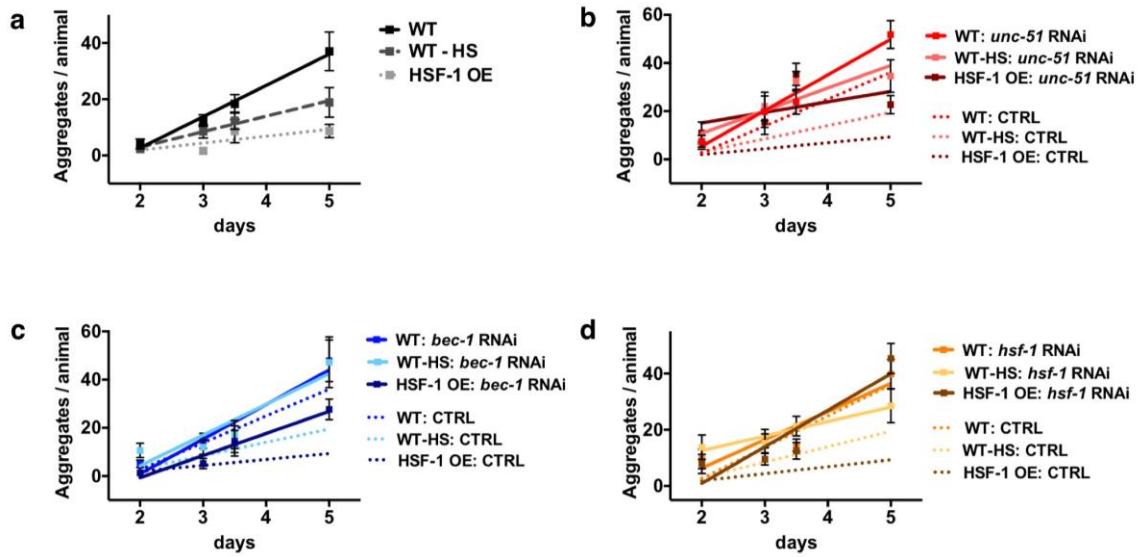

**Supplementary Figure 12. Reduction of autophagy gene expression exacerbates intestinal PolyQ aggregation.** PolyQ aggregates were counted in wild-type (WT) or HSF-1–overexpressing (HSF-1 OE) animals expressing intestinal PolyQ44 protein (*vha-6p::Q44::yfp*). Animals were maintained under control conditions or subjected to 1 h of heat shock at 36 °C (HS) on day 1 of adulthood. **(a)** Animals fed control bacteria. **(b–d)** Animals raised from hatching on control bacteria expressing empty vector (CTRL; dotted lines) or bacteria expressing dsRNA targeting the autophagy genes **(b)** *unc-51/ATG1*, **(c)** *bec-1/ATG6*, or **(d)** *hsf-1* (solid lines). The number of intestinal PolyQ aggregates in 10–30 animals was counted on days 2–5 and the data were plotted using linear regression. Error bars indicate s.e.m. The experiment was repeated at least three times with similar results.

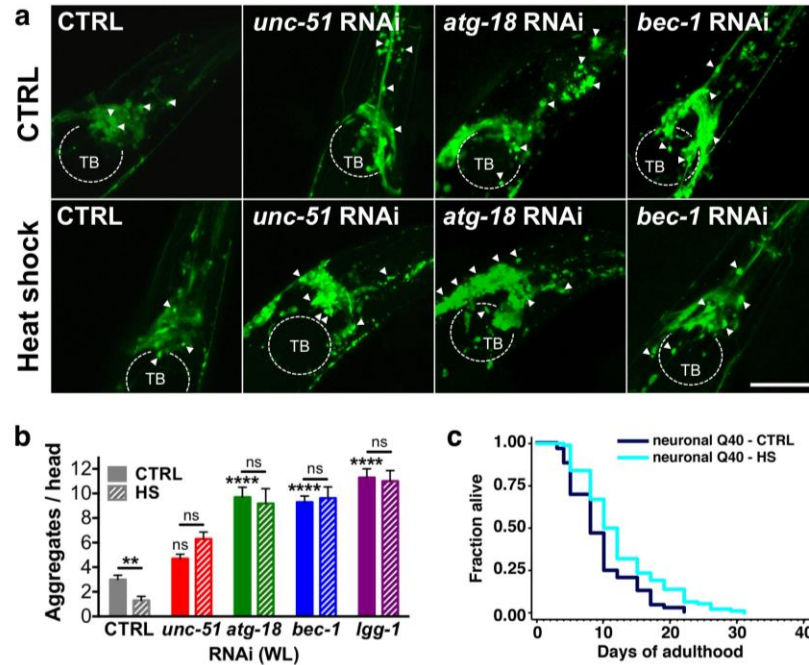

**Supplementary Figure 13. Hormetic heat shock reduces neuronal PolyQ protein aggregation in an autophagy-dependent manner.** (a) Neuronal PolyQ aggregates were counted on day 7 of adulthood in animals maintained under control conditions (CTRL) or subjected to 1 h of heat shock at 36°C (HS) on day 1 of adulthood. Animals expressing PolyQ40::YFP under the control of the neuronal-specific promoter *rgef-1* were fed from hatching with control bacteria (empty vector) or bacteria expressing dsRNA targeting *unc-51/ATG1*, *atg-18*, or *bec-1/ATG6*. Arrowheads indicate prominent aggregates. TB: terminal pharyngeal bulb. Scale bar: 20  $\mu$ m. (b) Quantification of neuronal PolyQ aggregates on day 7 of adulthood in animals fed from hatching (whole-life RNAi, WL) with control bacteria (empty vector, CTRL) or bacteria expressing dsRNA targeting *unc-51/ATG1*, *atg-18*, *bec-1/ATG6*, or *lgg-1/ATG8* (N=11–15). Animals fed bacteria expressing dsRNA targeting *hsf-1* did not survive until day 7 of adulthood (data not shown). Error bars indicate s.e.m. ns:  $P > 0.05$ , \*\* $P < 0.01$ , \*\*\*\* $P < 0.0001$  by two-way ANOVA. The experiments were repeated at least three times with similar results. (c) Lifespan analysis of animals expressing neuronal PolyQ40::YFP and subjected to hormetic heat shock (HS) on day 1 of adulthood. Neuronal Q40-CTRL animals (9.4 days, N = 118) compared to Neuronal Q40-HS animals (12.4 days, N = 94):  $P = 0.0001$ . See Supplementary Table 13 for details of lifespan analyses and replicate experiments.

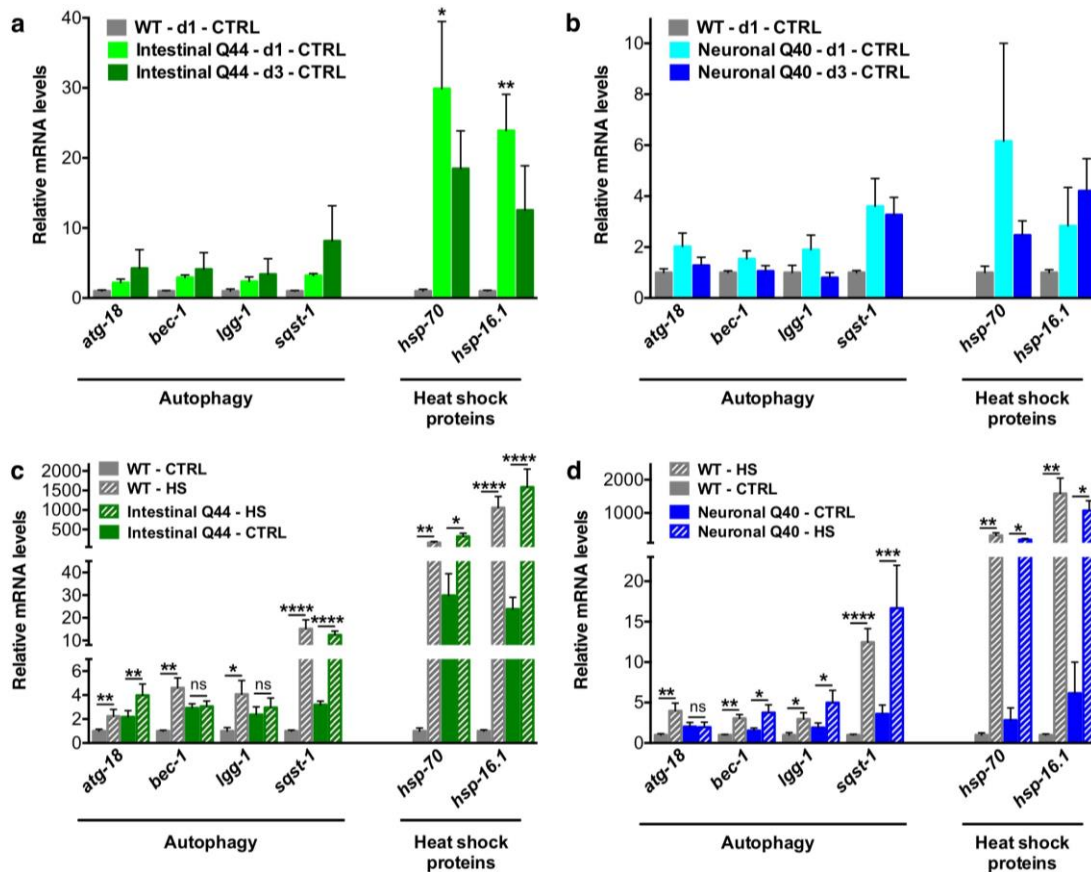

**Supplementary Figure 14. Hormetic heat shock induces autophagy gene transcription in animals expressing PolyQ proteins.** (a,b) Transcript levels of autophagy genes were measured in wild-type (WT, N2) animals on day 1 of adulthood and in animals expressing (a) intestinal PolyQ44 and (b) neuronal PolyQ40::YFP on day 1 and 3 of adulthood. (c,d) Transcript levels of autophagy genes were measured in WT animals and animals expressing Q44::YFP in the intestine (c) or Q40::YFP neurons (d) and maintained under control conditions (CTRL) or subjected to heat shock for 1 h at 36°C (HS) on day 1 of adulthood. Data are the mean  $\pm$  s.e.m. of three biological replicates, each with three technical replicates, and are normalized to the mean expression levels of two housekeeping genes. No symbol or ns:  $P > 0.05$ , \* $P < 0.05$ , \*\* $P < 0.01$ , \*\*\* $P < 0.001$ , \*\*\*\* $P < 0.0001$  by one-way ANOVA.

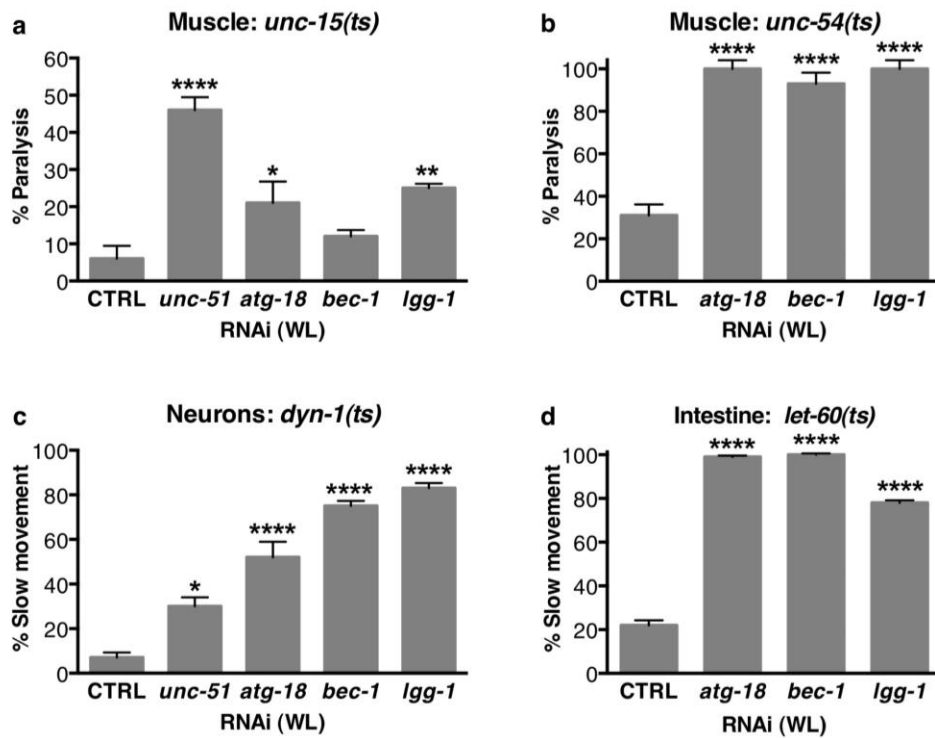

**Supplementary Figure 15. Reduction of autophagy genes exacerbates movement defects in temperature-sensitive protein misfolding mutants.** Paralysis was assessed in animals carrying temperature-sensitive (*ts*) missense mutations in (a) *unc-15(ts)* (paramyosin), (b) *unc-54(ts)* (myosin), both of which affect muscle function, (c) *dyn-1(ts)* (dynamin GTPase), which affects neuronal function, and (d) *let-60(ts)* (Ras protein), which affects intestinal and hypodermal cell function. Animals were fed from hatching (whole-life RNAi, WL) with control bacteria (empty vector, CTRL) or bacteria expressing dsRNA targeting the indicated autophagy genes. On day 5 of adulthood, slow movement or paralysis was scored at the semi-permissive temperature of 20°C (N = 10–30 animals, n = 3 plates). The experiment was performed at least three times with similar results. Error bars indicate s.e.m. \**P* < 0.05, \*\**P* < 0.01, \*\*\**P* < 0.001, \*\*\*\**P* < 0.0001 by one-way ANOVA.

## 2. Supplementary Tables

Supplementary Table 1: Thermorecovery analyses of wild-type animals after hormetic heat shock.

| Exp            | RNAi          | Heat shock conditions                 | Control              |     |                   | Heat shock and 0-hour Recovery |     |                   | P value (CTRL vs HS) |
|----------------|---------------|---------------------------------------|----------------------|-----|-------------------|--------------------------------|-----|-------------------|----------------------|
|                |               |                                       | % alive $\pm$ s.e.m. | N   | P value (vs CTRL) | % alive $\pm$ s.e.m.           | N   | P value (vs CTRL) |                      |
| 1              | CTRL          | HS: 1 h, 36°C, d1<br>TR: d5, 6 h      | 46 $\pm$ 7           | 121 | --                | 75 $\pm$ 2                     | 111 | --                | *                    |
|                | <i>unc-51</i> |                                       | 52 $\pm$ 4           | 80  | ns                | 65 $\pm$ 4                     | 92  | ns                | ns                   |
|                | <i>atg-18</i> |                                       | 54 $\pm$ 4           | 108 | ns                | 70 $\pm$ 8                     | 82  | ns                | ns                   |
|                | <i>bec-1</i>  |                                       | 53 $\pm$ 3           | 97  | ns                | 62 $\pm$ 7                     | 109 | ns                | ns                   |
|                | <i>lgg-1</i>  |                                       | 57 $\pm$ 2           | 118 | ns                | 59 $\pm$ 6                     | 117 | ns                | ns                   |
| 2 <sup>1</sup> | CTRL          | HS: 30 min, 36°C, d1<br>TR: d4, 9 h   | 25 $\pm$ 3           | 65  | --                | 62 $\pm$ 3                     | 90  | --                | ***                  |
|                | <i>unc-51</i> |                                       |                      |     |                   | 19 $\pm$ 3                     | 89  | ****              | ns                   |
|                | <i>bec-1</i>  |                                       |                      |     |                   | 26 $\pm$ 6                     | 73  | ****              | ns                   |
|                | <i>lgg-1</i>  |                                       |                      |     |                   | 25 $\pm$ 3                     | 79  | ****              | ns                   |
| 3              | CTRL          | HS: 30 min, 36°C, d1<br>TR: d4, 9 h   | 10 $\pm$ 2           | 105 | --                | 55 $\pm$ 7                     | 94  | --                | ***                  |
|                | <i>unc-51</i> |                                       |                      |     |                   | 18 $\pm$ 3                     | 87  | ***               | ns                   |
|                | <i>bec-1</i>  |                                       |                      |     |                   | 11 $\pm$ 2                     | 106 | ***               | ns                   |
|                | <i>lgg-1</i>  |                                       |                      |     |                   | 24 $\pm$ 8                     | 101 | **                | ns                   |
| 4              | CTRL          | HS: 30 min, 36°C, d1<br>TR: d4, 8 h   | 13 $\pm$ 2           | 86  | --                | 41 $\pm$ 3                     | 105 | --                | ***                  |
|                | <i>unc-51</i> |                                       |                      |     |                   | 14 $\pm$ 3                     | 100 | ***               | ns                   |
|                | <i>lgg-1</i>  |                                       |                      |     |                   | 15 $\pm$ 1                     | 84  | ***               | ns                   |
|                | <i>Imp-1</i>  |                                       |                      |     |                   | 7 $\pm$ 3                      | 86  | ***               | ns                   |
| 5              | CTRL          | HS: 30 min, 36°C, d1<br>TR: d5, 8 h   | 26 $\pm$ 1           | 111 | --                | 47 $\pm$ 2                     | 90  | --                | ***                  |
|                | <i>unc-51</i> |                                       |                      |     |                   | 25 $\pm$ 2                     | 107 | ****              | ns                   |
|                | <i>bec-1</i>  |                                       |                      |     |                   | 24 $\pm$ 2                     | 106 | ****              | ns                   |
|                | <i>lgg-1</i>  |                                       |                      |     |                   | 15 $\pm$ 2                     | 90  | ****              | ns                   |
| 6              | CTRL          | HS: 30 min, 36°C, d1<br>TR: d4, 8.5 h | 4 $\pm$ 2            | 87  | --                | 14 $\pm$ 4                     | 101 | --                | *                    |
|                | <i>unc-51</i> |                                       |                      |     |                   | 2 $\pm$ 1                      | 87  | **                | ns                   |
|                | <i>bec-1</i>  |                                       |                      |     |                   | 3 $\pm$ 1                      | 90  | *                 | ns                   |
|                | <i>lgg-1</i>  |                                       |                      |     |                   | 4 $\pm$ 3                      | 90  | *                 | ns                   |
|                | <i>Imp-1</i>  |                                       |                      |     |                   | 0 $\pm$ 0                      | 86  | **                | ns                   |
|                | <i>hsf-1</i>  |                                       |                      |     |                   | 1 $\pm$ 1                      | 89  | **                | ns                   |
| 7              | CTRL          | HS: 30 min, 36°C, d1<br>TR: d4, 7 h   | 23 $\pm$ 3           | 101 | --                | 40 $\pm$ 6                     | 112 | --                | *                    |
|                | <i>bec-1</i>  |                                       |                      |     |                   | 20 $\pm$ 4                     | 67  | *                 | ns                   |
|                | <i>lgg-1</i>  |                                       |                      |     |                   | 7 $\pm$ 2                      | 93  | **                | *                    |
| 8              | CTRL          | HS: 1 h, 36°C, d1<br>TR: d4, 7 h      | 40 $\pm$ 3           | 110 | --                | 69 $\pm$ 5                     | 92  | --                | ***                  |
|                | <i>bec-1</i>  |                                       | 35 $\pm$ 4           | 95  | ns                | 27 $\pm$ 4                     | 65  | ***               | ns                   |
| 9              | CTRL          | HS: 30 min, 36°C, d1<br>TR: d3, 7 h   | 26 $\pm$ 2           | 105 | --                | 60 $\pm$ 7                     | 102 | --                | ****                 |
|                | CTRL          | HS: 30 min, 36°C, d3<br>TR: d5, 7 h   | 45 $\pm$ 5           | 94  | ns                | 67 $\pm$ 7                     | 91  | ns                | **                   |
|                | CTRL          | HS: 30 min, 36°C, d5<br>TR: d7, 7 h   | 30 $\pm$ 2           | 89  | ns                | 42 $\pm$ 5                     | 74  | ns                | ns                   |
|                | CTRL          | HS: 30 min, 36°C, d7<br>TR: d9, 7 h   | 20 $\pm$ 2           | 99  | ns                | 30 $\pm$ 3                     | 90  | **                | ns                   |



(Supplementary Table 1 continued)

| Exp             | RNAi | Heat shock conditions                            | Control              |     |         | Heat shock and 0-hour Recovery |     |         | P value (CTRL vs HS) |
|-----------------|------|--------------------------------------------------|----------------------|-----|---------|--------------------------------|-----|---------|----------------------|
|                 |      |                                                  | % alive $\pm$ s.e.m. | N   | P value | % alive $\pm$ s.e.m.           | N   | P value |                      |
| 10              | CTRL | HS: 30 min, 36°C, d1<br>TR: d3, 7 h              | 25 $\pm$ 1           | 153 | --      | 56 $\pm$ 3                     | 126 | --      | ****                 |
|                 | CTRL | HS: 30 min, 36°C, d3<br>TR: d5, 7 h              | 33 $\pm$ 3           | 133 | ns      | 55 $\pm$ 4                     | 115 | ns      | **                   |
|                 | CTRL | HS: 30 min, 36°C, d5<br>TR: d7, 7 h              | 22 $\pm$ 2           | 93  | ns      | 33 $\pm$ 4                     | 85  | ns      | ns                   |
|                 | CTRL | HS: 30 min, 36°C, d7<br>TR: d9, 7 h              | 21 $\pm$ 5           | 51  | ns      | 17 $\pm$ 1                     | 60  | **      | ns                   |
| 11 <sup>2</sup> | CTRL | HS: 30 min, 36°C, d1<br>TR: d3, 7 h              | 46 $\pm$ 1           | 125 | --      | 74 $\pm$ 5                     | 115 | --      | ****                 |
|                 | CTRL | HS: 30 min, 36°C, d2<br>TR: d4, 7 h              | 46 $\pm$ 2           | 133 | ns      | 63 $\pm$ 4                     | 92  | ns      | **                   |
|                 | CTRL | HS: 30 min, 36°C, d3<br>TR: d5, 7 h              | 31 $\pm$ 3           | 107 | ns      | 51 $\pm$ 4                     | 102 | ***     | ***                  |
|                 | CTRL | HS: 30 min, 36°C, d5<br>TR: d7, 7 h              | 14 $\pm$ 3           | 89  | ****    | 33 $\pm$ 2                     | 86  | ****    | ***                  |
|                 | CTRL | HS: 30 min, 36°C, d7<br>TR: d9, 7 h              | 12 $\pm$ 2           | 79  | ****    | 13 $\pm$ 3                     | 75  | ****    | ns                   |
| 12 <sup>3</sup> | CTRL | HS: 30 min, 36°C, d1<br>TR: d3, 7 h              | 32 $\pm$ 4           | 86  | --      | 64 $\pm$ 3                     | 89  | --      | ****                 |
|                 | CTRL | Starvation: 90 min, M9, d1<br>TR: d3, 7 h        | 31 $\pm$ 3           | 87  | ns      |                                |     |         |                      |
|                 | CTRL | Starvation: 90 min, agarose, d1<br>TR: d3, 7 h   | 28 $\pm$ 3           | 87  | ns      |                                |     |         |                      |
| 13              | CTRL | HS: 30 min, 36°C, d1<br>TR: d3, 8.5 h            | 7 $\pm$ 2            | 111 | --      | 21 $\pm$ 2                     | 109 | --      | **                   |
|                 | CTRL | Starvation: 90 min, M9, d1<br>TR: d3, 8.5 h      | 8 $\pm$ 2            | 104 | ns      |                                |     |         |                      |
|                 | CTRL | Starvation: 90 min, agarose, d1<br>TR: d3, 8.5 h | 10 $\pm$ 3           | 110 | ns      |                                |     |         |                      |
| 14              | CTRL | HS: 30 min, 36°C, d1<br>TR: d3, 7 h              | 88 $\pm$ 2           | 117 | --      | 98 $\pm$ 1                     | 106 | --      | *                    |
|                 | CTRL | Starvation: 90 min, M9, d1<br>TR: d3, 8 h        | 84 $\pm$ 3           | 113 | ns      |                                |     |         |                      |
|                 | CTRL | Starvation: 90 min, agarose, d1<br>TR: d3, 8 h   | 88 $\pm$ 3           | 132 | ns      |                                |     |         |                      |

**Supplementary Table 1:** Survival analysis of wild-type animals fed from day 1 of adulthood with control bacteria (empty vector, CTRL) or bacteria expressing dsRNA targeting the indicated genes. Animals were maintained under control conditions or subjected to 30–60 min of hormetic heat shock (HS: 36°C) on the indicated day of adulthood or to food deprivation as indicated (experiments 12–14). Thermorecovery (TR) was tested on the indicated days of adulthood by incubating animals at 36°C for 6–9 h followed by ~20 h of recovery. Exp: experiment number (in chronological order); s.e.m.: standard error of the mean; N: number of animals analyzed (see Methods). The mean  $\pm$  s.e.m. percentage survival of experimental and control groups were analyzed using Student's *t*-test, one-way ANOVA, or two-way ANOVA. ns:  $P > 0.05$ , \* $P < 0.05$ , \*\* $P < 0.01$ , \*\*\* $P < 0.001$ , \*\*\*\* $P < 0.0001$ . <sup>1</sup>: data depicted in **Fig. 3a**; <sup>2</sup>: data depicted in **Supplementary Fig. 11a**; <sup>3</sup>: data depicted in **Supplementary Fig. 10b**.

**Supplementary Table 2: Lifespan analyses of wild-type animals after hormetic heat shock.**

| Exp            | RNAi          | Heat shock           | MLS (days) | N       | % MLS  | P value        |
|----------------|---------------|----------------------|------------|---------|--------|----------------|
| 1              | CTRL          | -                    | 22.4       | 106/124 |        |                |
|                | CTRL          | 1 h, 36°C, d1        | 26.3       | 99/129  | +17.4% | 0.0001 (****)  |
| 2              | CTRL          | -                    | 15.4       | 93/120  |        |                |
|                | CTRL          | 1 h, 36°C, d1        | 16.7       | 100/120 | +8.4%  | 0.1 (ns)       |
| 3              | CTRL          | -                    | 18.3       | 95/122  |        |                |
|                | CTRL          | 1 h, 36°C, d1        | 19.9       | 94/121  | +8.7%  | 0.0007 (***)   |
| 4              | CTRL          | -                    | 17.1       | 106/137 |        |                |
|                | CTRL          | 1 h, 36°C, d1        | 20.7       | 82/129  | +21.1% | 0.0005 (***)   |
|                | <i>unc-51</i> | 1 h, 36°C, d1        | 15.4       | 106/125 | -10.0% | 0.1 (ns)       |
|                | <i>atg-18</i> | 1 h, 36°C, d1        | 11.6       | 101/129 | -32.2% | <0.0001 (****) |
|                | <i>bec-1</i>  | 1 h, 36°C, d1        | 16.5       | 113/123 | -3.5%  | 0.1 (ns)       |
|                | <i>lgg-1</i>  | 1 h, 36°C, d1        | 15.3       | 103/126 | -10.5% | 0.08 (ns)      |
| 5              | CTRL          | -                    | 15.7       | 116/120 |        |                |
|                | CTRL          | 1 h, 36°C, d1        | 17.7       | 83/120  | +12.7% | 0.01 (**)      |
|                | <i>unc-51</i> | 1 h, 36°C, d1        | 15.5       | 110/120 | -1.3%  | 1.0 (ns)       |
|                | <i>atg-18</i> | 1 h, 36°C, d1        | 16.5       | 105/120 | +5.10% | 0.2 (ns)       |
|                | <i>bec-1</i>  | 1 h, 36°C, d1        | 15.5       | 93/120  | -1.3%  | 0.9 (ns)       |
|                | <i>lgg-1</i>  | 1 h, 36°C, d1        | 15.6       | 102/120 | -0.6%  | 0.8 (ns)       |
| 6 <sup>1</sup> | CTRL          | -                    | 19.2       | 104/125 |        |                |
|                | CTRL          | 30 min, 36°C, d1     | 23.7       | 94/111  | +23.4% | <0.0001 (****) |
|                | <i>unc-51</i> | -                    | 18.5       | 110/122 | -3.5%  | 0.3 (ns)       |
|                | <i>unc-51</i> | 30 min, 36°C, d1     | 17.5       | 107/128 | -8.8%  | 0.04 (*)       |
|                | <i>bec-1</i>  | -                    | 19.2       | 116/130 | 0%     | 0.2 (ns)       |
|                | <i>bec-1</i>  | 30 min, 36°C, d1     | 18.4       | 112/126 | -4.2%  | 0.3 (ns)       |
|                | <i>lgg-1</i>  | -                    | 18.1       | 108/125 | -5.7%  | 0.06 (ns)      |
|                | <i>lgg-1</i>  | 30 min, 36°C, d1     | 17.9       | 79/126  | -6.8%  | 0.7 (ns)       |
| 7              | CTRL          | -                    | 17.3       | 177/184 |        |                |
|                | CTRL          | 30 min, 36°C, d1     | 22.4       | 140/159 | +29.5% | <0.0001 (****) |
|                | <i>unc-51</i> | -                    | 17.3       | 137/141 | 0%     | 0.5 (ns)       |
|                | <i>unc-51</i> | 30 min, 36°C, d1     | 16.5       | 148/154 | -4.6%  | 0.4 (ns)       |
|                | <i>lgg-1</i>  | -                    | 19.3       | 142/146 | +11.6% | 0.1 (ns)       |
|                | <i>lgg-1</i>  | 30 min, 36°C, d1     | 17.4       | 171/180 | -9.8%  | 0.2 (ns)       |
| 8              | --            | -                    | 14.4       | 107/120 |        |                |
|                | --            | 30 min, 36°C, d1     | 21.4       | 85/121  | +48.6% | <0.0001 (****) |
|                | --            | 30 min, 36°C, d3     | 16.6       | 103/128 | +15.3% | 0.006 (***)    |
|                | --            | 30 min, 36°C, d5     | 17.3       | 89/120  | +20.1% | 0.0006 (***)   |
|                | --            | 30 min, 36°C, d7     | 14.4       | 95/120  | 0%     | 0.7 (ns)       |
|                | --            | 90 min in liquid M91 | 15.1       | 94/122  | +4.9%  | 0.2 (ns)       |

(Supplementary Table 2 continued)

| Exp             | RNAi | Heat shock               | MLS (days) | N       | % MLS  | P value       |
|-----------------|------|--------------------------|------------|---------|--------|---------------|
| 9 <sup>2</sup>  | --   | -                        | 12.4       | 157/162 |        |               |
|                 | --   | 30 min, 36°C, d1         | 17.4       | 131/145 | +40.3% | <0.0001(****) |
|                 | --   | 30 min, 36°C, d3         | 14.6       | 130/160 | +17.7% | 0.0006 (***)  |
|                 | --   | 30 min, 36°C, d5         | 14.3       | 142/164 | +15.3% | 0.001 (***)   |
|                 | --   | 30 min, 36°C, d7         | 14.5       | 140/160 | +16.9% | 0.001 (***)   |
|                 | --   | 90 min in liquid M9      | 13.1       | 134/151 | +5.6%  | 0.2 (ns)      |
|                 | --   | 90 min on agarose plates | 12.9       | 143/161 | +4.0%  | 0.3 (ns)      |
| 10 <sup>3</sup> | --   | -                        | 17.7       | 119/124 |        |               |
|                 | --   | 30 min, 36°C, d1         | 23.4       | 109/124 | +32.2% | <0.0001(****) |
|                 | --   | 30 min, 36°C, d3         | 23.6       | 92/127  | +33.3% | <0.0001(****) |
|                 | --   | 30 min, 36°C, d5         | 20.3       | 94/136  | +14.7% | 0.0004 (***)  |
|                 | --   | 30 min, 36°C, d7         | 19.6       | 110/122 | +10.7% | 0.04 (*)      |
|                 | --   | 90 min in liquid M9      | 17.1       | 122/127 | -3.4%  | 0.8 (ns)      |
|                 | --   | 90 min on agarose plates | 16.9       | 115/125 | -4.6%  | 0.6 (ns)      |

**Supplementary Table 2:** Lifespan analysis of wild-type animals subjected to hormetic heat shock at 36°C (HS) for 30–60 min on the indicated day of adulthood (d1: day 1, d3: day 3, d5: day 5, d7: day 7). Animals were fed from day 1 of adulthood with control bacteria (empty vector, CTRL) or bacteria expressing dsRNA targeting the indicated autophagy genes. If no RNAi is indicated, the animals were fed OP50 bacteria throughout life. Exp: experiment number (in chronological order); MLS: mean lifespan; N: observed deaths/total number of animals subjected to RNAi; % MLS: percentage change in lifespan compared with control; ns:  $P > 0.05$ , \* $P < 0.05$ , \*\* $P < 0.01$ , \*\*\* $P < 0.001$ , \*\*\*\* $P < 0.0001$  by log-rank test. <sup>1</sup>: data depicted in **Fig. 3c–e**; <sup>2</sup>: data for CTRL and food deprivation depicted in **Supplementary Fig. 10c**; <sup>3</sup>: data depicted in **Supplementary Fig. 11b**.

**Supplementary Table 3: Autophagy measurements in wild-type animals after hormetic heat shock.**

| Hypodermal seam cells |     |               |                   |     |                   |     |                     |
|-----------------------|-----|---------------|-------------------|-----|-------------------|-----|---------------------|
| Exp                   | Age | Recovery time | Control           |     | Heat shock        |     | P value             |
|                       |     |               | Mean $\pm$ s.e.m. | N   | Mean $\pm$ s.e.m. | N   |                     |
| 1                     | L3  | 0 h           | 0.4 $\pm$ 0.4     | 189 | 0.9 $\pm$ 0.1     | 144 | ****                |
| 2                     | L3  | 0 h           | 0.3 $\pm$ 0.04    | 200 | 1.0 $\pm$ 0.2     | 229 | ****                |
| 3                     | L3  | 0 h           | 0.4 $\pm$ 0.06    | 87  | 1.3 $\pm$ 0.1     | 111 | ****                |
| 4                     | L3  | 0 h           | 0.3 $\pm$ 0.03    | 234 | 0.9 $\pm$ 0.1     | 190 | ****                |
| 5                     | L3  | 0 h           | 0.2 $\pm$ 0.04    | 169 | 1.0 $\pm$ 0.1     | 152 | ***                 |
| 6                     | L3  | 0 h           | 0.3 $\pm$ 0.04    | 173 | 0.9 $\pm$ 0.1     | 162 | ****                |
| 7                     | D1  | 0 h           | 0.3 $\pm$ 0.06    | 83  | 0.8 $\pm$ 0.1     | 70  | ***                 |
| 8                     | D1  | 0 h           | 0.4 $\pm$ 0.07    | 82  | 3.6 $\pm$ 0.2     | 66  | ****                |
| 10                    | D1  | 0 h           | 0.5 $\pm$ 0.12    | 49  | 2.0 $\pm$ 0.1     | 47  | ****                |
| 11                    | D1  | 0 h           | 0.2 $\pm$ 0.03    | 148 | 1.0 $\pm$ 0.1     | 111 | ****                |
|                       |     | 2 h           |                   |     | 1.7 $\pm$ 0.1     | 126 | ****                |
|                       |     | 4 h           |                   |     | 1.1 $\pm$ 0.1     | 115 | ****                |
|                       |     | 6 h           |                   |     | 0.9 $\pm$ 0.1     | 125 | ****                |
|                       |     | 24 h          |                   |     | 1.01 $\pm$ 0.1    | 113 | ****                |
| 12 <sup>2</sup>       | D1  | Pre-HS        | 0.5 $\pm$ 0.1     | 101 | 0.3 $\pm$ 0.04    | 191 | ns                  |
|                       |     | 0 h           |                   |     | 1.1 $\pm$ 0.1     | 124 | ****<br>(vs pre-HS) |
|                       |     | 2 h           |                   |     | 1.5 $\pm$ 0.1     | 120 | ****                |
|                       |     | 4 h           | 0.4 $\pm$ 0.1     | 114 | 1.6 $\pm$ 0.1     | 122 | ****                |
|                       |     | 6 h           |                   |     | 1.2 $\pm$ 0.1     | 119 | ****                |
| 13                    | D1  | 24 h          | 0.4 $\pm$ 0.1     | 100 | 1.4 $\pm$ 0.1     | 87  | ****                |
|                       |     | 0 h           | 0.3 $\pm$ 0.1     | 120 | 1.2 $\pm$ 0.1     | 125 | ****                |
|                       |     | 2 h           |                   |     | 2.0 $\pm$ 0.1     | 119 | ****                |
|                       |     | 4 h           |                   |     | 2.0 $\pm$ 0.1     | 130 | ****                |
|                       |     | 6 h           |                   |     | 2.0 $\pm$ 0.1     | 148 | ****                |
| 14                    | D1  | 24 h          |                   |     | 2.1 $\pm$ 0.1     | 104 | ****                |
|                       |     | 0 h           | 0.3 $\pm$ 0.1     | 97  | 1.2 $\pm$ 0.1     | 112 | ****                |
|                       |     | 2 h           |                   |     | 2.0 $\pm$ 0.1     | 64  | ****                |
|                       |     | 4 h           | 0.4 $\pm$ 0.1     | 115 | 1.7 $\pm$ 0.1     | 87  | ****                |
|                       |     | 6 h           |                   |     | 1.8 $\pm$ 0.1     | 116 | ****                |
| 15                    | L4  | 24 h          | 0.4 $\pm$ 0.1     | 103 | 1.6 $\pm$ 0.1     | 105 | ****                |
|                       |     | 0 h           | 0.5 $\pm$ 0.1     | 113 | 1.0 $\pm$ 0.1     | 81  | **                  |
|                       |     | 2 h           | 0.4 $\pm$ 0.1     | 106 | 1.1 $\pm$ 0.1     | 97  | ****                |
| 16 <sup>1</sup>       | D1  | 24 h          | 0.5 $\pm$ 0.1     | 101 | 0.8 $\pm$ 0.2     | 51  | ns                  |
|                       |     | 0 h           | 0.5 $\pm$ 0.1     | 98  | 1.9 $\pm$ 0.2     | 63  | ****                |
|                       |     | 2 h           |                   |     | 2.0 $\pm$ 0.1     | 98  | ****                |
|                       |     | 24 h          |                   |     | 1.7 $\pm$ 0.1     | 83  | ****                |

(Supplementary Table 3 continued)

| Intestine      |     |               |                   |    |                   |    |         |
|----------------|-----|---------------|-------------------|----|-------------------|----|---------|
| Exp            | Age | Recovery time | Control           |    | Heat shock        |    | P value |
|                |     |               | Mean $\pm$ s.e.m. | N  | Mean $\pm$ s.e.m. | N  |         |
| 1              | D1  | 4 h           | 5.9 $\pm$ 1.0     | 7  | 11.0 $\pm$ 2.0    | 10 | ****    |
| 2              | D1  | 4 h           | 6.0 $\pm$ 0.5     | 12 | 9.6 $\pm$ 1.0     | 12 | **      |
| 3              | D1  | 4 h           | 3.0 $\pm$ 0.3     | 20 | 5.0 $\pm$ 0.8     | 20 | ***     |
| 4 <sup>1</sup> | D1  | 4 h           | 3.0 $\pm$ 1.2     | 16 | 19.3 $\pm$ 4.8    | 14 | ****    |
| 5              | D1  | 4 h           | 2.3 $\pm$ 0.5     | 8  | 10.3 $\pm$ 1.5    | 10 | ****    |
| 6 <sup>3</sup> | D1  | 4 h           | 8.0 $\pm$ 1.1     | 5  | 27.4 $\pm$ 1.0    | 7  | ****    |
| 7              | D1  | 0 h           | 3.0 $\pm$ 0.3     | 20 | 0.8 $\pm$ 0.28    | 20 | ****    |
|                |     | 4 h           | 2.1 $\pm$ 0.2     | 20 | 5.0 $\pm$ 0.8     | 20 | ***     |
|                |     | 24 h          | 2.9 $\pm$ 0.3     | 20 | 2.2 $\pm$ 0.3     | 20 | ns      |
|                |     | 72 h          | 3.5 $\pm$ 0.30    | 20 | 3.4 $\pm$ 0.2     | 20 | ns      |
| 8              | D1  | 0 h           | 2.6 $\pm$ 0.4     | 20 | 2.7 $\pm$ 0.4     | 20 | ns      |
|                |     | 2 h           | 2.7 $\pm$ 0.3     | 20 | 3.3 $\pm$ 0.3     | 20 | ns      |
|                |     | 4 h           | 2.5 $\pm$ 0.3     | 20 | 7.1 $\pm$ 0.7     | 20 | ***     |
|                |     | 6 h           | 2.0 $\pm$ 0.3     | 20 | 7.6 $\pm$ 0.6     | 20 | ****    |
|                |     | 24 h          | 1.6 $\pm$ 0.3     | 20 | 1.7 $\pm$ 0.3     | 20 | ns      |
| 9 <sup>2</sup> | D1  | 0 h           | 3.6 $\pm$ 0.4     | 14 | 3.1 $\pm$ 0.5     | 14 | ns      |
|                |     | 2 h           | 2.8 $\pm$ 0.4     | 15 | 2.35 $\pm$ 0.3    | 17 | ns      |
|                |     | 4 h           | 2.5 $\pm$ 0.2     | 14 | 10.7 $\pm$ 1.0    | 15 | ****    |
|                |     | 9 h           | 2.7 $\pm$ 0.3     | 17 | 15.3 $\pm$ 1.0    | 17 | ****    |
|                |     | 24 h          | 4.1 $\pm$ 0.4     | 16 | 4.6 $\pm$ 0.3     | 14 | ns      |
| 10             | L4  | 2 h           | 3.6 $\pm$ 1.7     | 13 | 3.3 $\pm$ 1.5     | 17 | ns      |
|                |     | 4 h           | 3.8 $\pm$ 1.6     | 15 | 14.2 $\pm$ 6.5    | 13 | ****    |
|                |     | 24 h          | 4.9m $\pm$ 2.1    | 16 | 4.0 $\pm$ 1.3     | 15 | ns      |
| 11             | D1  | 2 h           | 1.9 $\pm$ 1.0     | 16 | 2.2 $\pm$ 1.1     | 13 | ns      |
|                |     | 4 h           | 3.7 $\pm$ 1.8     | 15 | 15.1 $\pm$ 5.6    | 14 | ****    |
|                |     | 24 h          | 3.7 $\pm$ 1.4     | 40 | 3.1 $\pm$ 0.8     | 16 | ns      |
| 12             | D2  | 2 h           | 1.5 $\pm$ 1.0     | 14 | 1.9 $\pm$ 1.2     | 17 | ns      |
|                |     | 4 h           | 2.1 $\pm$ 1.5     | 15 | 10.6 $\pm$ 4.8    | 15 | ****    |
|                |     | 24 h          | 3.8 $\pm$ 1.1     | 13 | 2.7 $\pm$ 1.5     | 14 | ns      |
| 13             | D1  | 4 h           | 4.9 $\pm$ 2.1     | 16 | 13.9 $\pm$ 7.6    | 13 | ****    |
|                |     | 24 h          | 3.7 $\pm$ 1.5     | 15 | 4.5 $\pm$ 2.5     | 16 | ns      |
|                | D2  | 4 h           | 3.7 $\pm$ 1.4     | 13 | 7.8 $\pm$ 3.4     | 13 | **      |
|                |     | 24 h          | 3.7 $\pm$ 1.3     | 15 | 3.4 $\pm$ 1.1     | 14 | ns      |
| 14             | D1  | 0 h           | 4.9 $\pm$ 0.7     | 12 | 4.7 $\pm$ 0.6     | 11 | ns      |
|                |     | 2 h           |                   |    | 10.7 $\pm$ 2.5    | 10 | ns      |
|                |     | 4 h           |                   |    | 24.3 $\pm$ 3.1    | 10 | ****    |
|                |     | 6 h           |                   |    | 23.7 $\pm$ 2.7    | 11 | ****    |
|                |     | 8 h           |                   |    | 14.8 $\pm$ 2.5    | 12 | ***     |
|                |     | 10 h          |                   |    | 11.6 $\pm$ 1.4    | 11 | ns      |
|                |     | 24 h          |                   |    | 5.7 $\pm$ 0.4     | 10 | ns      |

(Supplementary Table 3 continued)

| Neurons        |     |               |                   |    |                   |    |         |
|----------------|-----|---------------|-------------------|----|-------------------|----|---------|
| Exp            | Age | Recovery time | Control           |    | Heat shock        |    | P value |
|                |     |               | Mean $\pm$ s.e.m. | N  | Mean $\pm$ s.e.m. | N  |         |
| 1              | D1  | 2 h           | 26.1 $\pm$ 3.90   | 12 | 30.7 $\pm$ 4.05   | 12 | **      |
| 2 <sup>1</sup> | D1  | 2 h           | 23.8 $\pm$ 0.84   | 12 | 30.1 $\pm$ 0.84   | 12 | ***     |
| 3 <sup>4</sup> | D1  | 2 h           | 41.8 $\pm$ 3.50   | 6  | 57.7 $\pm$ 1.61   | 6  | **      |
| 4              | D1  | 2 h           | 12.7 $\pm$ 4.30   | 12 | 18.5 $\pm$ 3.00   | 11 | **      |
|                |     | 24 h          | 16.2 $\pm$ 1.70   | 11 | 22.1 $\pm$ 4.30   | 7  | **      |
|                |     | 48 h          | 21.8 $\pm$ 3.70   | 12 | 26.0 $\pm$ 3.70   | 7  | **      |
| 5 <sup>2</sup> | L4  | 2 h           | 17.0 $\pm$ 2.04   | 14 | 16.6 $\pm$ 3.12   | 14 | ns      |
|                |     | 4 h           | 14.5 $\pm$ 2.96   | 13 | 14.5 $\pm$ 3.36   | 13 | ns      |
|                |     | 6 h           | 12.6 $\pm$ 1.83   | 12 | 12.8 $\pm$ 1.99   | 12 | ns      |
|                |     | 8 h           | 17.7 $\pm$ 3.61   | 13 | 16.9 $\pm$ 3.97   | 13 | ns      |
|                |     | 10 h          | 18.8 $\pm$ 3.67   | 12 | 17.8 $\pm$ 3.72   | 13 | ns      |
|                |     | 24 h          | 22.0 $\pm$ 3.36   | 13 | 20.5 $\pm$ 3.55   | 13 | ns      |
| 6              | D1  | 2 h           | 25.1 $\pm$ 4.62   | 14 | 32.9 $\pm$ 3.63   | 14 | ***     |
|                |     | 4 h           | 25.9 $\pm$ 4.86   | 14 | 29.8 $\pm$ 4.06   | 14 | ns      |
|                |     | 6 h           | 23.8 $\pm$ 3.24   | 14 | 21.2 $\pm$ 4.21   | 13 | ns      |
|                |     | 8 h           | 22.4 $\pm$ 4.74   | 14 | 22.3 $\pm$ 3.38   | 13 | ns      |
|                |     | 10 h          | 19.4 $\pm$ 2.56   | 14 | 18.6 $\pm$ 3.48   | 14 | ns      |
|                |     | 24 h          | 25.9 $\pm$ 5.44   | 14 | 25.4 $\pm$ 4.50   | 14 | ns      |
| 7              | L4  | 0 h           | 17.6 $\pm$ 3.99   | 13 | 18.9 $\pm$ 2.32   | 14 | ns      |
|                |     | 2 h           | 15.8 $\pm$ 3.95   | 11 | 17.9 $\pm$ 3.17   | 13 | ns      |
|                |     | 24 h          | 19.2 $\pm$ 3.49   | 14 | 22.5 $\pm$ 3.89   | 15 | ns      |
|                |     | 48 h          | 24.2 $\pm$ 4.93   | 12 | 26.1 $\pm$ 5.62   | 12 | ns      |
| 8              | D1  | 0 h           | 18.2 $\pm$ 2.91   | 13 | 13.9 $\pm$ 3.43   | 14 | ns      |
|                |     | 2 h           | 14.6 $\pm$ 1.69   | 11 | 20.3 $\pm$ 3.77   | 13 | **      |
|                |     | 24 h          | 22.8 $\pm$ 4.66   | 13 | 24.9 $\pm$ 4.11   | 14 | ns      |
|                |     | 48 h          | 24.5 $\pm$ 6.19   | 13 | 25.4 $\pm$ 6.28   | 13 | ns      |
| 9              | D2  | 0 h           | 17.8 $\pm$ 2.98   | 12 | 15.3 $\pm$ 2.81   | 14 | ns      |
|                |     | 2 h           | 14.7 $\pm$ 2.42   | 12 | 18.5 $\pm$ 3.69   | 13 | *       |
|                |     | 24 h          | 24.0 $\pm$ 2.91   | 10 | 22.5 $\pm$ 5.47   | 13 | ns      |
|                |     | 48 h          | 26.9 $\pm$ 3.59   | 14 | 27.8 $\pm$ 3.46   | 12 | ns      |
| 10             | D1  | 2 h           | 19.6 $\pm$ 3.55   | 12 | 22.4 $\pm$ 4.06   | 12 | ns      |
|                |     | 4 h           | 18.1 $\pm$ 2.71   | 14 | 22.2 $\pm$ 2.93   | 11 | **      |
|                |     | 6 h           | 18.5 $\pm$ 2.91   | 12 | 21.0 $\pm$ 2.42   | 13 | *       |
|                |     | 24 h          | 21.7 $\pm$ 2.61   | 12 | 26.8 $\pm$ 1.76   | 12 | ****    |
| 11             | D1  | 2 h           | 21.2 $\pm$ 0.58   | 12 | 26.8 $\pm$ 0.88   | 12 | ****    |
|                |     | 24 h          | 27.3 $\pm$ 1.11   | 11 | 27.1 $\pm$ 1.70   | 10 | ns      |

(Supplementary Table 3 continued)

| Muscle         |     |               |                   |    |                   |    |         |
|----------------|-----|---------------|-------------------|----|-------------------|----|---------|
| Exp            | Age | Recovery time | Control           |    | Heat shock        |    | P value |
|                |     |               | Mean $\pm$ s.e.m. | N  | Mean $\pm$ s.e.m. | N  |         |
| 1 <sup>1</sup> | D1  | 0 h           | 0.6 $\pm$ 0.5     | 12 | 6.4 $\pm$ 1.1     | 10 | ****    |
| 2              | D1  | 0 h           | 3.9 $\pm$ 0.7     | 8  | 7.8 $\pm$ 1.2     | 9  | *       |
| 3              | D1  | 0 h           | 0.6 $\pm$ 0.4     | 10 | 3.3 $\pm$ 0.3     | 9  | **      |
| 4 <sup>2</sup> | D1  | 0 h           | 1.6 $\pm$ 0.4     | 10 | 3.6 $\pm$ 0.8     | 10 | *       |
|                |     | 2 h           | 1.4 $\pm$ 0.5     | 11 | 2.8 $\pm$ 0.7     | 11 | ns      |
|                |     | 4 h           | 0.9 $\pm$ 0.4     | 12 | 1.0 $\pm$ 0.3     | 12 | ns      |
|                |     | 24 h          | 0.8 $\pm$ 0.2     | 12 | 1.8 $\pm$ 0.5     | 12 | ns      |
| 5              | D1  | 0 h           | 10.9 $\pm$ 1.38   | 13 | 15.1 $\pm$ 2.1    | 13 | *       |
|                |     | 2 h           |                   |    | 9.4 $\pm$ 1.6     | 13 | ns      |
|                |     | 4 h           |                   |    | 8.1 $\pm$ 1.4     | 12 | ns      |
|                |     | 6 h           |                   |    | 13.6 $\pm$ 2.3    | 11 | ns      |
|                |     | 8 h           |                   |    | 9.4 $\pm$ 2.2     | 11 | ns      |
|                |     | 10 h          |                   |    | 10.6 $\pm$ 1.3    | 12 | ns      |

**Supplementary Table 3:** GFP::LGG-1-positive punctae were quantified in the hypodermal seam cells, intestine, and muscle of animals expressing *lgg-1p::gfp::lgg-1* (DA2123) and in the neurons of animals expressing *rgef-1p::gfp::lgg-1* (MAH242). Animals were maintained under control conditions or subjected to 1 h of hormetic heat shock followed by the indicated recovery time. ns:  $P > 0.05$ , \* $P < 0.05$ , \*\* $P < 0.01$ , \*\*\* $P < 0.001$ , \*\*\*\* $P < 0.0001$  by Student's *t*-test (control vs heat shock conditions), one-way ANOVA (time-course experiments), or two-way ANOVA (control vs heat shock conditions at multiple time points). Exp: experiment number (listed in chronological order); s.e.m.: standard error of the mean; N: number of cells, animals, or image fields analyzed (see Methods). <sup>1</sup>: data depicted in **Fig. 1a–d**; <sup>2</sup>: data depicted in **Supplementary Fig. 5**; <sup>3</sup>: analyzed from images acquired by confocal microscopy; <sup>4</sup>: analyzed from Z-stack images acquired by confocal microscopy.

**Supplementary Table 4: Autophagy measurements in animals expressing GFP::LGG-1(G116A) after hormetic heat shock.**

| Hypodermal seam cells (0-hour Recovery) |               |    |               |    |         |                   |    |               |     |         |
|-----------------------------------------|---------------|----|---------------|----|---------|-------------------|----|---------------|-----|---------|
| Exp                                     | WT            |    |               |    |         | GFP::LGG-1(G116A) |    |               |     |         |
|                                         | Control       |    | Heat shock    |    | P value | Control           |    | Heat shock    |     | P value |
|                                         | Mean ± s.e.m. | N  | Mean ± s.e.m. | N  |         | Mean ± s.e.m.     | N  | Mean ± s.e.m. | N   |         |
| 1                                       | 0.36 ± 0.06   | 89 | 3.4 ± 0.2     | 91 | ****    | 0.02 ± 0.02       | 89 | 0.02 ± 0.1    | 89  | ns      |
| 2 <sup>1</sup>                          | 0.36 ± 0.09   | 45 | 2.7 ± 0.3     | 51 | ****    | 0.07 ± 0.03       | 56 | 0.2 ± 0.1     | 60  | ns      |
| 3                                       | 0.25 ± 0.05   | 85 | 2.4 ± 0.1     | 91 | ****    | 0.03 ± 0.02       | 96 | 0.01 ± 0.01   | 89  | ns      |
| 4                                       | 0.34 ± 0.08   | 79 | 2.7 ± 0.2     | 80 | ****    | 0.03 ± 0.02       | 94 | 0.04 ± 0.2    | 115 | ns      |
| Intestine (4-hour Recovery)             |               |    |               |    |         |                   |    |               |     |         |
| Exp                                     | WT            |    |               |    |         | GFP::LGG-1(G116A) |    |               |     |         |
|                                         | Control       |    | Heat shock    |    | P value | Control           |    | Heat shock    |     | P value |
|                                         | Mean ± s.e.m. | N  | Mean ± s.e.m. | N  |         | Mean ± s.e.m.     | N  | Mean ± s.e.m. | N   |         |
| 1 <sup>1</sup>                          | 2.1 ± 0.4     | 13 | 9.5 ± 1.0     | 13 | ****    | 0 ± 0             | 14 | 0 ± 0         | 13  | ns      |
| 2                                       | 4.7 ± 0.8     | 7  | 14.4 ± 2.2    | 8  | ****    | 0 ± 0             | 6  | 0 ± 0         | 7   | ns      |
| 3                                       | 1.4 ± 0.3     | 10 | 5.5 ± 1.1     | 8  | ****    | 0 ± 0             | 11 | 0 ± 0         | 10  | ns      |
| Muscle (0-hour Recovery)                |               |    |               |    |         |                   |    |               |     |         |
| Exp                                     | WT            |    |               |    |         | GFP::LGG-1(G116A) |    |               |     |         |
|                                         | Control       |    | Heat shock    |    | P value | Control           |    | Heat shock    |     | P value |
|                                         | Mean ± s.e.m. | N  | Mean ± s.e.m. | N  |         | Mean ± s.e.m.     | N  | Mean ± s.e.m. | N   |         |
| 1                                       | 0.8 ± 0.4     | 11 | 2.9 ± 0.6     | 12 | **      | 0 ± 0             | 9  | 0 ± 0         | 11  | ns      |
| 2                                       | 0.67 ± 0.2    | 12 | 2.2 ± 0.3     | 12 | ****    | 0 ± 0             | 12 | 0 ± 0         | 12  | ns      |
| 3 <sup>1</sup>                          | 1.5 ± 0.4     | 11 | 5.2 ± 0.9     | 10 | ****    | 0 ± 0             | 11 | 0 ± 0         | 11  | ns      |

**Supplementary Table 4:** GFP::LGG-1-positive punctae were quantified in the hypodermal seam cells, intestine, and muscle of animals expressing *lgg-1p::gfp::lgg-1* (DA2123) or *lgg-1p::gfp::lgg-1(G116A)* (RD202). Animals were maintained under control conditions or subjected to 1 h of hormetic heat shock followed by the indicated recovery time. ns:  $P > 0.05$ , \*\* $P < 0.01$ , \*\*\*\* $P < 0.0001$  by two-way ANOVA; Exp: experiment number (in chronological order); s.e.m.: standard error of the mean; N: number of cells or animals. <sup>1</sup>: data depicted in **Supplementary Fig. 2**.



**Supplementary Table 5: Autophagy measurements in wild-type animals subjected to RNAi treatments and a hormetic heat shock.**

| Hypodermal seam cells |     |               |               |     |                   |                                |     |                   |                      |
|-----------------------|-----|---------------|---------------|-----|-------------------|--------------------------------|-----|-------------------|----------------------|
| Exp                   | Age | RNAi          | Control       |     |                   | Heat shock and 0-hour Recovery |     |                   | P value (CTRL vs HS) |
|                       |     |               | Mean ± s.e.m. | N   | P value (vs CTRL) | Mean ± s.e.m.                  | N   | P value (vs CTRL) |                      |
| 1                     | L3  | CTRL          | 0.3 ± 0.1     | 118 | --                | 1.5 ± 0.1                      | 139 | --                | ****                 |
|                       | L3  | <i>atg-13</i> | 1.1 ± 0.1     | 97  | ****              | 3.3 ± 0.2                      | 92  | ****              | ****                 |
|                       | L3  | <i>atg-18</i> | 0.3 ± 0.1     | 142 | ns                | 0.6 ± 0.1                      | 109 | ****              | ns                   |
| 2                     | D1  | CTRL          | 0.3 ± 0.1     | 96  | --                | 0.9 ± 0.09                     | 158 | --                | ***                  |
|                       | D1  | <i>atg-13</i> | 1.6 ± 0.1     | 91  | ****              | 1.9 ± 0.1                      | 103 | ****              | ns                   |
|                       | D1  | <i>atg-18</i> | 0.2 ± 0.04    | 150 | ns                | 0.2 ± 0.04                     | 139 | ****              | ns                   |
| 3                     | D1  | CTRL          | 0.6 ± 0.1     | 105 | --                | 15 ± 0.1                       | 96  | --                | ****                 |
|                       | D1  | <i>unc-51</i> | 0.6 ± 0.1     | 99  | ns                | 1.8 ± 0.1                      | 110 | ns                | ****                 |
|                       | D1  | <i>atg-13</i> | 1.5 ± 0.1     | 86  | ****              | 1.8 ± 0.1                      | 82  | ns                | ns                   |
|                       | D1  | <i>atg-18</i> | 0.3 ± 0.1     | 76  | ns                | 0.4 ± 0.1                      | 122 | ****              | ns                   |
|                       | D1  | <i>bec-1</i>  | 0.6 ± 0.1     | 121 | ns                | 0.8 ± 0.1                      | 105 | **                | ns                   |
| 4                     | D1  | CTRL          | 1.1 ± 0.1     | 77  | --                | 1.9 ± 0.1                      | 72  | --                | ***                  |
|                       | D1  | <i>unc-51</i> | 1.0 ± 0.1     | 92  | ns                | 1.4 ± 0.1                      | 71  | ns                | ns                   |
|                       | D1  | <i>atg-13</i> | 3.1 ± 0.3     | 69  | ****              | 2.5 ± 0.1                      | 85  | ns                | *                    |
|                       | D1  | <i>atg-18</i> | 0.4 ± 0.1     | 81  | *                 | 0.2 ± 0.1                      | 103 | ****              | ns                   |
|                       | D1  | <i>bec-1</i>  | 1.9 ± 0.2     | 76  | ***               | 1.0 ± 0.1                      | 76  | ***               | ****                 |
| 5 <sup>1</sup>        | D1  | CTRL          | 0.3 ± 0.1     | 80  | --                | 1.5 ± 0.2                      | 66  | --                | ****                 |
|                       | D1  | <i>unc-51</i> | 0.2 ± 0.04    | 100 | ns                | 0.1 ± 0.1                      | 77  | ****              | ns                   |
|                       | D1  | <i>atg-18</i> | 0.1 ± 0.04    | 86  | ns                | 0.1 ± 0.04                     | 73  | ****              | ns                   |
|                       | D1  | <i>bec-1</i>  | 0.5 ± 0.1     | 82  | ns                | 0.2 ± 0.1                      | 64  | ****              | *                    |
| 6                     | D1  | CTRL          | 0.2 ± 0.04    | 169 | --                | 1.0 ± 0.1                      | 152 | --                | ****                 |
|                       | D1  | <i>hsf-1</i>  | 1.2 ± 0.1     | 131 | ****              | 0.7 ± 0.1                      | 170 | *                 | ****                 |
| 7                     | D1  | CTRL          | 0.3 ± 0.04    | 173 | --                | 0.9 ± 0.1                      | 162 |                   | ****                 |
|                       | D1  | <i>hsf-1</i>  | 1.2 ± 0.1     | 151 | ****              | 0.7 ± 0.1                      | 135 | ns                | ****                 |
| 8 <sup>2</sup>        | D1  | CTRL          | 0.5 ± 0.1     | 49  | --                | 2.0 ± 0.1                      | 47  | --                | ****                 |
|                       | D1  | <i>hsf-1</i>  | 2.1 ± 0.1     | 57  | ****              | 0.5 ± 0.1                      | 50  | ****              | ****                 |
| Intestine             |     |               |               |     |                   |                                |     |                   |                      |
| Exp                   | Age | RNAi          | Control       |     |                   | Heat shock and 4-hour Recovery |     |                   | P value (CTRL vs HS) |
|                       |     |               | Mean ± s.e.m. | N   | P value (vs CTRL) | Mean ± s.e.m.                  | N   | P value (vs CTRL) |                      |
| 1                     | D1  | CTRL          | 2.9 ± 0.3     | 17  | --                | 4.7 ± 0.3                      | 17  | --                | *                    |
|                       |     | <i>unc-51</i> | 2.7 ± 0.4     | 18  | ns                | 5.0 ± 0.6                      | 18  | ns                | **                   |
|                       |     | <i>atg-18</i> | 3.8 ± 0.5     | 16  | ns                | 4.5 ± 0.5                      | 17  | ns                | ns                   |
|                       |     | <i>bec-1</i>  | 5.3 ± 0.6     | 17  | **                | 3.5 ± 0.6                      | 17  | ns                | *                    |

(Supplementary Table 5 continued)

| Exp            | Age | RNAi                      | Control           |    |                   | Heat shock and 4-hour Recovery |    |                   | P value (CTRL vs HS) |
|----------------|-----|---------------------------|-------------------|----|-------------------|--------------------------------|----|-------------------|----------------------|
|                |     |                           | Mean $\pm$ s.e.m. | N  | P value (vs CTRL) | Mean $\pm$ s.e.m.              | N  | P value (vs CTRL) |                      |
| 2 <sup>1</sup> | D1  | CTRL                      | 2.3 $\pm$ 0.4     | 12 | --                | 11.8 $\pm$ 1.4                 | 13 | --                | ****                 |
|                |     | <i>unc-51</i>             | 1.7 $\pm$ 0.3     | 12 | ns                | 11.1 $\pm$ 1.4                 | 13 | ns                | ****                 |
|                |     | <i>atg-18</i>             | 0.7 $\pm$ 0.2     | 12 | ns                | 3.3 $\pm$ 0.9                  | 13 | ****              | ns                   |
|                |     | <i>bec-1</i>              | 2.6 $\pm$ 0.4     | 12 | ns                | 4.2 $\pm$ 1.1                  | 13 | ****              | ns                   |
|                |     | <i>atg-7</i>              | 1.8 $\pm$ 0.5     | 12 | ns                | 2.2 $\pm$ 1.2                  | 13 | ****              | ns                   |
|                |     | <i>atg-13</i>             | 2.3 $\pm$ 0.3     | 13 | ns                | 10.2 $\pm$ 0.9                 | 13 | ns                | ****                 |
|                |     | <i>hsf-1</i>              | 2.1 $\pm$ 0.4     | 12 | ns                | 0.9 $\pm$ 0.3                  | 13 | ****              | ns                   |
| 3              | D1  | CTRL                      | 3.0 $\pm$ 0.6     | 10 | --                | 18.3 $\pm$ 1.5                 | 12 |                   | ***                  |
|                |     | <i>unc-51</i>             | 3.3 $\pm$ 0.8     | 10 | ns                | 19.8 $\pm$ 1.2                 | 12 | ns                | ****                 |
|                |     | <i>atg-18</i>             | 3.4 $\pm$ 0.5     | 10 | ns                | 4.8 $\pm$ 1.2                  | 12 | ****              | ns                   |
|                |     | <i>bec-1</i>              | 2.7 $\pm$ 0.4     | 10 | ns                | 5.8 $\pm$ 1.2                  | 12 | ****              | ns                   |
|                |     | <i>hsf-1</i> <sup>2</sup> | 5.5 $\pm$ 0.8     | 11 | ns                | 0.7 $\pm$ 0.31                 | 12 | ****              | **                   |
| <b>Neurons</b> |     |                           |                   |    |                   |                                |    |                   |                      |
| Exp            | Age | RNAi                      | Control           |    |                   | Heat shock and 2-hour Recovery |    |                   | P value (CTRL vs HS) |
|                |     |                           | Mean $\pm$ s.e.m. | N  | P value (vs CTRL) | Mean $\pm$ s.e.m.              | N  | P value (vs CTRL) |                      |
| 1 <sup>1</sup> | D1  | CTRL                      | 24.7 $\pm$ 1.1    | 12 | --                | 31.0 $\pm$ 1.6                 | 12 |                   | ns                   |
|                |     | <i>lgg-1</i>              | 6.4 $\pm$ 0.9     | 12 | ****              | 5.8 $\pm$ 0.7                  | 12 | ****              | ns                   |
|                |     | <i>unc-51</i>             | 23.6 $\pm$ 1.1    | 12 | ns                | 15.7 $\pm$ 1.7                 | 11 | ****              | *                    |
|                |     | <i>atg-18</i>             | 24.3 $\pm$ 1.9    | 11 | ns                | 21.8 $\pm$ 1.5                 | 13 | **                | ns                   |
|                |     | <i>bec-1</i>              | 29.6 $\pm$ 1.8    | 11 | ns                | 23.0 $\pm$ 1.8                 | 11 | *                 | ns                   |
|                |     | <i>atg-7</i>              | 26.7 $\pm$ 1.4    | 11 | ns                | 25.7 $\pm$ 1.7                 | 12 | ns                | ns                   |
|                |     | <i>atg-13</i>             | 27.8 $\pm$ 1.3    | 12 | ns                | 17.3 $\pm$ 1.5                 | 12 | ****              | ***                  |
|                |     | <i>hsf-1</i>              | 30.8 $\pm$ 1.8    | 12 | ns                | 18.8 $\pm$ 1.5                 | 12 | ****              | ****                 |
| 2              | D1  | CTRL                      | 21.6 $\pm$ 0.6    | 11 | --                | 27.9 $\pm$ 1.4                 | 11 | --                | *                    |
|                |     | <i>lgg-1</i>              | 15.7 $\pm$ 1.5    | 11 | ns                | 17.2 $\pm$ 1.2                 | 11 | ****              | ns                   |
|                |     | <i>unc-51</i>             | 13.3 $\pm$ 1.1    | 11 | ***               | 15.1 $\pm$ 0.8                 | 11 | ****              | ns                   |
|                |     | <i>atg-18</i>             | 13.6 $\pm$ 2.0    | 11 | ***               | 12.1 $\pm$ 1.2                 | 11 | ****              | ns                   |
|                |     | <i>bec-1</i>              | 17.3 $\pm$ 1.0    | 11 | ns                | 17.6 $\pm$ 1.0                 | 11 | ****              | ns                   |
|                |     | <i>atg-7</i>              | 17.8 $\pm$ 1.2    | 11 | ns                | 17.0 $\pm$ 1.0                 | 11 | ****              | ns                   |
|                |     | <i>atg-13</i>             | 14.5 $\pm$ 0.7    | 11 | **                | 17.0 $\pm$ 1.3                 | 11 | ****              | ns                   |
|                |     | <i>hsf-1</i> <sup>2</sup> | 20.4 $\pm$ 0.7    | 12 | ns                | 14.6 $\pm$ 1.1                 | 11 | ****              | **                   |

(Supplementary Table 5 continued)

| Muscle         |     |               |                   |    |                   |                                |    |                   |                      |
|----------------|-----|---------------|-------------------|----|-------------------|--------------------------------|----|-------------------|----------------------|
| Exp            | Age | RNAi          | Control           |    |                   | Heat shock and 0-hour Recovery |    |                   | P value (CTRL vs HS) |
|                |     |               | Mean $\pm$ s.e.m. | N  | P value (vs CTRL) | Mean $\pm$ s.e.m.              | N  | P value (vs CTRL) |                      |
| 1 <sup>1</sup> | D1  | CTRL          | 1.5 $\pm$ 0.4     | 13 | --                | 5.3 $\pm$ 1.2                  | 12 | --                | ****                 |
|                |     | <i>unc-51</i> | 1.9 $\pm$ 0.4     | 13 | ns                | 2.9 $\pm$ 0.9                  | 11 | ns                | ns                   |
|                |     | <i>atg-18</i> | 1.9 $\pm$ 0.7     | 13 | ns                | 1.5 $\pm$ 0.5                  | 13 | **                | ns                   |
|                |     | <i>bec-1</i>  | 2.4 $\pm$ 0.8     | 13 | ns                | 1.7 $\pm$ 0.4                  | 13 | *                 | ns                   |
|                |     | <i>atg-7</i>  | 0.7 $\pm$ 0.3     | 13 | ns                | 1.4 $\pm$ 0.3                  | 13 | **                | ns                   |
|                |     | <i>atg-13</i> | 3.4 $\pm$ 0.8     | 13 | ns                | 1.6 $\pm$ 0.5                  | 13 | **                | ns                   |
|                |     | <i>hsf-1</i>  | 3.1 $\pm$ 0.8     | 13 | ns                | 1.6 $\pm$ 0.6                  | 12 | **                | ns                   |
| 2              | D1  | CTRL          | 2.1 $\pm$ 0.5     | 9  | --                | 5.0 $\pm$ 1.0                  | 11 | --                | *                    |
|                |     | <i>unc-51</i> | 2.3 $\pm$ 0.5     | 10 | ns                | 2.0 $\pm$ 0.4                  | 12 | *                 | ns                   |
|                |     | <i>atg-18</i> | 1.3 $\pm$ 0.6     | 11 | ns                | 0.9 $\pm$ 0.3                  | 11 | ****              | ns                   |
|                |     | <i>bec-1</i>  | 1.7 $\pm$ 0.6     | 10 | ns                | 1.4 $\pm$ 0.5                  | 12 | ***               | ns                   |
|                |     | <i>hsf-1</i>  | 2.5 $\pm$ 0.6     | 10 | ns                | 1.7 $\pm$ 0.4                  | 11 | **                | ns                   |
| 3 <sup>2</sup> | D1  | CTRL          | 0.6 $\pm$ 0.4     | 10 | --                | 3.3 $\pm$ 0.3                  | 9  | --                | ****                 |
|                | D1  | <i>hsf-1</i>  | 0.9 $\pm$ 0.4     | 8  | ns                | 0.7 $\pm$ 0.2                  | 10 | ****              | ns                   |

**Supplementary Table 5:** GFP::LGG-1-positive punctae were quantified in the hypodermal seam cells, intestine, and muscle of animals expressing *lgg-1p::gfp::lgg-1* (DA2123) or in the neurons of animals expressing *rgef-1p::gfp::lgg-1* (MAH242) raised from hatching (WL: whole-life RNAi) on control bacteria (empty vector, CTRL) or bacteria expressing dsRNA targeting the indicated genes. Animals were maintained under control conditions or subjected to 1 h of hormetic heat shock at 36°C followed by the indicated recovery time. ns:  $P > 0.05$ , \* $P < 0.05$ , \*\* $P < 0.01$ , \*\*\* $P < 0.001$ , \*\*\*\* $P < 0.0001$  by two-way ANOVA; Exp: experiment number (in chronological order); s.e.m.: standard error of the mean; N: number of cells or animals analyzed (see Methods). <sup>1</sup>: data depicted in **Supplementary Fig. 3**; <sup>2</sup>: data depicted in **Supplementary Fig. 8**.

**Supplementary Table 6: Autophagy measurements in wild-type animals following different durations of heat shock.**

| <b>Hypodermal seam cells (0-hour Recovery)</b> |            |                   |                      |          |                |
|------------------------------------------------|------------|-------------------|----------------------|----------|----------------|
| <b>Exp</b>                                     | <b>Age</b> | <b>Heat shock</b> | <b>Mean ± s.e.m.</b> | <b>N</b> | <b>P value</b> |
| 1                                              | D1         | CTRL              | 0.4 ± 0.1            | 74       |                |
|                                                |            | 15 min            | 2.7 ± 0.2            | 64       | ****           |
|                                                |            | 30 min            | 3.6 ± 0.3            | 47       | ****           |
|                                                |            | 45 min            | 3.1 ± 0.2            | 49       | ****           |
|                                                |            | 60 min            | 2.7 ± 0.2            | 49       | ****           |
| 2 <sup>1</sup>                                 | D1         | CTRL              | 0.4 ± 0.1            | 95       |                |
|                                                |            | 15 min            | 1.7 ± 0.1            | 75       | ****           |
|                                                |            | 30 min            | 2.0 ± 0.1            | 78       | ****           |
|                                                |            | 45 min            | 1.9 ± 0.1            | 82       | ****           |
|                                                |            | 60 min            | 1.8 ± 0.1            | 96       | ****           |
| <b>Intestine (4-hour Recovery)</b>             |            |                   |                      |          |                |
| <b>Exp</b>                                     | <b>Age</b> | <b>Heat shock</b> | <b>Mean ± s.e.m.</b> | <b>N</b> | <b>P value</b> |
| 1                                              | D1         | CTRL              | 2.8 ± 1.1            | 13       |                |
|                                                |            | 15 min            | 3.1 ± 1.1            | 15       | ns             |
|                                                |            | 30 min            | 4.5 ± 2.4            | 13       | ns             |
|                                                |            | 45 min            | 14.1 ± 5.7           | 13       | ****           |
|                                                |            | 60 min            | 19.3 ± 4.8           | 14       | ****           |
| 2 <sup>1</sup>                                 | D1         | CTRL              | 3.7 ± 0.3            | 13       |                |
|                                                |            | 15 min            | 3.9 ± 0.3            | 11       | ns             |
|                                                |            | 30 min            | 5.0 ± 0.4            | 12       | ns             |
|                                                |            | 45 min            | 10.4 ± 1.0           | 12       | ****           |
|                                                |            | 60 min            | 14.1 ± 1.2           | 12       | ****           |
| <b>Neurons (2-hour Recovery)</b>               |            |                   |                      |          |                |
| <b>Exp</b>                                     | <b>Age</b> | <b>Heat shock</b> | <b>Mean ± s.e.m.</b> | <b>N</b> | <b>P value</b> |
| 1                                              | D1         | CTRL              | 17.1 ± 0.8           | 12       |                |
|                                                |            | 15 min            | 21.3 ± 0.6           | 11       | ***            |
|                                                |            | 30 min            | 20.5 ± 0.6           | 13       | **             |
|                                                |            | 45 min            | 20.1 ± 0.7           | 10       | *              |
|                                                |            | 60 min            | 20.3 ± 0.8           | 12       | **             |
| 2 <sup>1</sup>                                 | D1         | CTRL              | 17.8 ± 0.7           | 12       |                |
|                                                |            | 15 min            | 25.6 ± 0.9           | 13       | ****           |
|                                                |            | 30 min            | 22.9 ± 0.9           | 12       | ***            |
|                                                |            | 45 min            | 24.2 ± 0.7           | 13       | ****           |
|                                                |            | 60 min            | 22.2 ± 0.9           | 13       | **             |

(Supplementary Table 6 continued)

| Muscle (0-hour Recovery) |     |            |                   |      |               |
|--------------------------|-----|------------|-------------------|------|---------------|
| Exp                      | Age | Heat shock | Mean $\pm$ s.e.m. | N    | P value       |
| 1 <sup>1</sup>           | D1  | CTRL       | 1.9 $\pm$ 0.3     | 12   |               |
|                          |     | 15 min     | 5.9 $\pm$ 0.9     | 12   | *             |
|                          |     | 30 min     | 7.5 $\pm$ 0.9     | 12   | ***           |
|                          |     | 45 min     | 9.2 $\pm$ 1.7     | 10   | ****          |
|                          |     | 60 min     | 6.6 $\pm$ 1.1     | 10   | *             |
|                          |     | 2          | D1                | CTRL | 3.3 $\pm$ 0.6 |
|                          |     | 15 min     | 8.8 $\pm$ 1.6     | 10   | **            |
|                          |     | 30 min     | 8.1 $\pm$ 1.6     | 10   | *             |
|                          |     | 45 min     | 7.8 $\pm$ 0.9     | 10   | *             |
|                          |     | 60 min     | 7.5 $\pm$ 1.1     | 10   | *             |

**Supplementary Table 6:** GFP::LGG-1-positive punctae were quantified in the hypodermal seam cells, intestine, and muscle of animals expressing *lgg-1p::gfp::lgg-1* (DA2123) and in the neurons of animals expressing *rgef-1p::gfp::lgg-1* (MAH242). Animals were maintained under control conditions or subjected to heat shock at 36°C for the indicated times on day 1 of adulthood followed by the indicated recovery time. ns:  $P > 0.05$ , \* $P < 0.05$ , \*\* $P < 0.01$ , \*\*\* $P < 0.001$ , \*\*\*\* $P < 0.0001$  by one-way ANOVA; Exp: experiment number (in chronological order); s.e.m.: standard error of the mean; N: number of cells or animals analyzed (see Methods). <sup>1</sup>: data depicted in **Supplementary Fig. 6**.

**Supplementary Table 7: Autophagy measurements in animals overexpressing HSF-1.**

| Hypodermal seam cells |     |               |     |               |     |         |
|-----------------------|-----|---------------|-----|---------------|-----|---------|
| Exp                   | Age | Wild-type     |     | HSF-1 OE      |     | P value |
|                       |     | Mean ± s.e.m. | N   | Mean ± s.e.m. | N   |         |
| 1                     | D1  | 0.7 ± 0.3     | 171 | 1.7 ± 0.2     | 79  | ***     |
| 2 <sup>1</sup>        | D1  | 0.6 ± 0.1     | 163 | 1.4 ± 0.1     | 131 | ****    |
| Intestine             |     |               |     |               |     |         |
| Exp                   | Age | Wild-type     |     | HSF-1 OE      |     | P value |
|                       |     | Mean ± s.e.m. | N   | Mean ± s.e.m. | N   |         |
| 1 <sup>1</sup>        | D1  | 2.4 ± 0.3     | 13  | 3.8 ± 0.6     | 13  | *       |
| 2                     | D1  | 5.5 ± 0.6     | 10  | 8.3 ± 0.6     | 10  | **      |
| Neurons               |     |               |     |               |     |         |
| Exp                   | Age | Wild-type     |     | HSF-1 OE      |     | P value |
|                       |     | Mean ± s.e.m. | N   | Mean ± s.e.m. | N   |         |
| 1 <sup>1</sup>        | D1  | 23.2 ± 1.6    | 11  | 29.3 ± 1.6    | 12  | *       |
| 2                     | D1  | 19.0 ± 2.2    | 4   | 25.7 ± 1.1    | 6   | *       |
| Muscle                |     |               |     |               |     |         |
| Exp                   | Age | Wild-type     |     | HSF-1 OE      |     | P value |
|                       |     | Mean ± s.e.m. | N   | Mean ± s.e.m. | N   |         |
| 1 <sup>1</sup>        | D1  | 0.4 ± 0.7     | 10  | 1.2 ± 0.3     | 10  | *       |
| 2                     | D1  | 0.6 ± 0.2     | 14  | 1.5 ± 0.3     | 15  | *       |

**Supplementary Table 7:** GFP::LGG-1-positive punctae were quantified in the hypodermal seam cells, intestine, and muscle of animals expressing *lgg-1p::gfp::lgg-1* (MAH236) and *lgg-1p::gfp::lgg-1 + let-858p::hsf-1* (MAH534) and in the neurons of animals expressing *rgef-1p::gfp::lgg-1* (MAH242) and *rgef-1p::gfp::lgg-1 + let-858p::hsf-1* (MAH552). \* $P < 0.05$ , \*\* $P < 0.01$ , \*\*\* $P < 0.001$ , \*\*\*\* $P < 0.0001$  by Student's *t*-test; Exp: experiment number (in chronological order); s.e.m.: standard error of the mean; N: number of cells or animals analyzed (see Methods). <sup>1</sup>: data depicted in **Fig. 2a–d**.

**Supplementary Table 8: HSE elements in promoter regions of autophagy-related genes in *C. elegans*.**

| Gene            | Sequence name | Function                                                | Putative HSE                                                                       | Distance of HSE to start site |
|-----------------|---------------|---------------------------------------------------------|------------------------------------------------------------------------------------|-------------------------------|
|                 |               |                                                         | 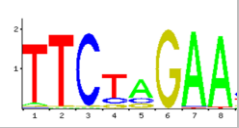 |                               |
| <i>asp-1</i>    | Y39B6A.20     | Lysosomal cathepsin D aspartic protease                 | TTCTAGAT                                                                           | -1834 bp                      |
|                 |               |                                                         | GTCTAGAA                                                                           | -1733 bp                      |
|                 |               |                                                         | TTCTAGAA                                                                           | -711 bp                       |
| <i>atg-16.1</i> | F02E8.5       | Autophagosome elongation                                | CTCTAGAA                                                                           | -1196 bp                      |
| <i>atg-3</i>    | Y55F3AM.4     | AuTophagy (yeast Atg homolog)                           | TTCTCGAA                                                                           | -1685 bp                      |
|                 |               |                                                         | GTCTAGAA                                                                           | -852 bp                       |
|                 |               |                                                         | TTCTGGAA                                                                           | -703 bp                       |
|                 |               |                                                         | TTCTGGAA                                                                           | -487 bp                       |
|                 |               |                                                         | TTCTGGAA                                                                           | -45 bp                        |
| <i>atg-4.1</i>  | Y87G2A.3      | Autophagosome elongation                                | TTCGAGAA                                                                           | -258 bp                       |
|                 |               |                                                         | TTCGAGAA                                                                           | -177 bp                       |
| <i>atg-4.2</i>  | ZK792.8       | Autophagosome elongation                                | TTCTGGAA                                                                           | -1230 bp                      |
|                 |               |                                                         | TTCTAGAC                                                                           | -1033 bp                      |
| <i>atg-5</i>    | Y71G12B.12    | Autophagosome elongation                                | TTCTCGAA                                                                           | -534 bp                       |
| <i>atg-7</i>    | M7.5          | Autophagosome elongation                                | TTCTAGAA                                                                           | -1406 bp                      |
| <i>atg-9</i>    | T22H9.2       | Phagophore formation                                    | ATCTCGAA                                                                           | -1956 bp                      |
|                 |               |                                                         | TTCTCGAA                                                                           | -857 bp                       |
|                 |               |                                                         | TTCCAGAA                                                                           | -535 bp                       |
| <i>bec-1</i>    | T19E7.3       | Membrane nucleation                                     | TTCTGGAA                                                                           | -1906 bp                      |
|                 |               |                                                         | TTCTGGAA                                                                           | -1817 bp                      |
|                 |               |                                                         | TTCTAGAT                                                                           | -1769 bp                      |
|                 |               |                                                         | TTCTCGAA                                                                           | -1468 bp                      |
|                 |               |                                                         | TTCCAGAA                                                                           | -596 bp                       |
| C06G3.6         | C06G3.6       | Hypothetical protein                                    | TTCTAGAA                                                                           | -65 bp                        |
|                 |               |                                                         | TTCCAGAA                                                                           | -44 bp                        |
| C08H9.1         | C08H9.1       | Putative lysosomal serine carboxypeptidase/CTSA homolog | TTCTCGAA                                                                           | -1236 bp                      |
|                 |               |                                                         | TTCCAGAA                                                                           | -375 bp                       |
| <i>ced-9</i>    | T07C4.8       | Homolog of the mammalian cell-death inhibitor Bcl-2     | TTCCAGAA                                                                           | -1453 bp                      |
|                 |               |                                                         | GTCTAGAA                                                                           | -44 bp                        |
| <i>epg-2</i>    | Y39G10AR.10   | Ectopic P granule protein                               | TTCTGGAA                                                                           | -1888 bp                      |
| <i>epg-4</i>    | F37C12.2      | Ectopic P granule protein                               | TTCTGGAA                                                                           | -1828 bp                      |
| <i>epg-5</i>    | C56C10.12     | Ectopic P granule protein                               | TTCTAGAT                                                                           | -707 bp                       |
|                 |               |                                                         | TTCTCGAA                                                                           | -473 bp                       |

(Supplementary Table 8 continued)

| Gene           | Sequence name | Function Putative                          | Putative HSE                                                                       | Distance of HSE to start site |
|----------------|---------------|--------------------------------------------|------------------------------------------------------------------------------------|-------------------------------|
|                |               |                                            | 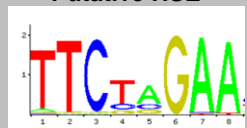 |                               |
| <i>epg-6</i>   | Y39A1A.1      | Ectopic P granule protein                  | TTCTCGAA                                                                           | -984 bp                       |
|                |               |                                            | TTCCAGAA                                                                           | -945 bp                       |
|                |               |                                            | TTCTCGAA                                                                           | -49 bp                        |
|                |               |                                            | TTCCAGAA                                                                           | -10 bp                        |
| <i>epg-8</i>   | Y106G6A.2     | Ectopic P granule protein                  | TTCGAGAA                                                                           | -1826 bp                      |
|                |               |                                            | TTCGAGAA                                                                           | -1552 bp                      |
|                |               |                                            | TTCGAGAA                                                                           | -990 bp                       |
| <i>epg-9</i>   | Y69A2AR.7     | Ectopic P granule protein                  | TTCCAGAA                                                                           | -1852 bp                      |
|                |               |                                            | TTCTGGAA                                                                           | -1112 bp                      |
|                |               |                                            | CTCTAGAA                                                                           | -447 bp                       |
|                |               |                                            | ATCTCGAA                                                                           | -397 bp                       |
|                |               |                                            | TTCCAGAA                                                                           | -238 bp                       |
| <i>gpd-2</i>   | K10B3.8       | Glyceraldehyde-3-phosphate dehydrogenase 2 | TTCTCGAA                                                                           | -1440 bp                      |
|                |               |                                            | TTCTAGAA                                                                           | -552 bp                       |
|                |               |                                            | TTCTCGAA                                                                           | -364 bp                       |
| <i>hlh-30</i>  | W02C12.3      | TFEB homolog                               | ATCTAGAA                                                                           | -1575 bp                      |
|                |               |                                            | GTCTAGAA                                                                           | -1200 bp                      |
|                |               |                                            | GTCTAGAA                                                                           | -523 bp                       |
| <i>let-363</i> | B0261.2       | MTOR homolog                               | TTCTAGAA                                                                           | -2047 bp                      |
|                |               |                                            | TTCCAGAA                                                                           | -2010 bp                      |
|                |               |                                            | ATCTAGAA                                                                           | -1553 bp                      |
|                |               |                                            | TTCCAGAA                                                                           | -710 bp                       |
|                |               |                                            | TTCTAGAT                                                                           | -479 bp                       |
| <i>lgg-2</i>   | ZK593.6       | Autophagosome elongation                   | TTCTAGAG                                                                           | -1633 bp                      |
|                |               |                                            | TTCCAGAA                                                                           | -1574 bp                      |
|                |               |                                            | TTCTAGAG                                                                           | -811 bp                       |
|                |               |                                            | TTCTAGAG                                                                           | -272 bp                       |
| <i>lgg-3</i>   | B0336.8       | Autophagosome elongation                   | ATCTCGAA                                                                           | -1539 bp                      |
| <i>lip1-3</i>  | R11G11.14     | Lysosomal lipolysis                        | TTCTAGAA                                                                           | -1105 bp                      |
| <i>lip1-4</i>  | K04A8.5       | Lysosomal lipolysis                        | TTCTAGAC                                                                           | -1006 bp                      |
|                |               |                                            | TTCTGGAA                                                                           | -338 bp                       |
|                |               |                                            | TTCTAGAC                                                                           | -285 bp                       |
| <i>imp-2</i>   | C05D9.2       | Lysosomal membrane                         | TTCTAGAT                                                                           | -1764 bp                      |
|                |               |                                            | TTCTAGAA                                                                           | -813 bp                       |
| <i>sdz-30</i>  | T04D3.2       | SKN-1 Dependent Zygotic transcript         | TTCTAGAA                                                                           | -1534 bp                      |
|                |               |                                            | TTCTAGAA                                                                           | -1509 bp                      |



(Supplementary Table 8 continued)

| Gene            | Sequence name | Function                                             | Putative HSE                                                                       | Distance of HSE to start site |
|-----------------|---------------|------------------------------------------------------|------------------------------------------------------------------------------------|-------------------------------|
|                 |               |                                                      | 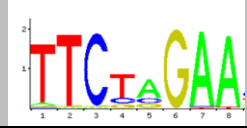 |                               |
| <i>sepa-1</i>   | M01E5.6       | Suppressor of ectopic P granules in autophagy mutant | TTCCAGAA                                                                           | -18 bp                        |
| <i>sqst-1</i>   | T12G3.1       | Cargo sequestration                                  | TTCTAGAG                                                                           | -944 bp                       |
|                 |               |                                                      | TTCTAGAG                                                                           | -419 bp                       |
| <i>sqst-2</i>   | Y40C5A.1      | Cargo sequestration                                  | TTCTGGAA                                                                           | -1391 bp                      |
|                 |               |                                                      | TTCTAGAC                                                                           | -1232 bp                      |
| <i>sqst-3</i>   | T26H2.5       | Cargo sequestration                                  | TTCCAGAA                                                                           | -1802 bp                      |
| <i>sqst-4</i>   | Y32B12A.1     | Cargo sequestration                                  | TTCTAGAA                                                                           | -1256 bp                      |
| <i>sul-3</i>    | C54D2.4       | Lysosomal sulfatase                                  | TTCTAGAA                                                                           | -1253 bp                      |
|                 |               |                                                      | TTCTAGAA                                                                           | -1145 bp                      |
|                 |               |                                                      | TTCTCGAA                                                                           | -256 bp                       |
|                 |               |                                                      | TTCTCGAA                                                                           | -148 bp                       |
| <i>T04D3.1</i>  | T04D3.1       | SEPA-like <sup>2</sup>                               | TTCTAGAA                                                                           | -409 bp                       |
|                 |               |                                                      | TTCTAGAA                                                                           | -384 bp                       |
| <i>vet-2</i>    | C35E7.1       | SEPA-like <sup>2</sup>                               | GTCTAGAA                                                                           | -793 bp                       |
| <i>vet-6</i>    | F44F1.7       | SEPA-like <sup>2</sup>                               | TTCTAGAT                                                                           | -327 bp                       |
|                 |               |                                                      | GTCTAGAA                                                                           | -48 bp                        |
|                 |               |                                                      | TTCCAGAA                                                                           | -21 bp                        |
| <i>vha-15</i>   | T14F9.1       | Vacuolar pH                                          | TTCTGGAA                                                                           | -1009 bp                      |
|                 |               |                                                      | TTCTAGAA                                                                           | -717 bp                       |
|                 |               |                                                      | TTCGAGAT                                                                           | -574 bp                       |
|                 |               |                                                      | TTCTGGAA                                                                           | -157 bp                       |
| <i>vps-11</i>   | R06F6.2       | Lysosomal Fusion                                     | TTCCAGAA                                                                           | -1813 bp                      |
| <i>vps-15</i>   | ZK930.12      | Lysosomal Fusion                                     | TTCCAGAA                                                                           | -1690 bp                      |
|                 |               |                                                      | TTCGAGAA                                                                           | -452 bp                       |
| <i>vps-18</i>   | W06B4.3       | Lysosomal Fusion                                     | TTCTCGAA                                                                           | -1867 bp                      |
|                 |               |                                                      | TTCTGGAA                                                                           | -1301 bp                      |
|                 |               |                                                      | TTCTCGAA                                                                           | -1180 bp                      |
|                 |               |                                                      | TTCTGGAA                                                                           | -1040 bp                      |
| <i>vps-34</i>   | B0025.1       | Membrane nucleation                                  | TTCGAGAA                                                                           | -1995 bp                      |
|                 |               |                                                      | TTCTCGAA                                                                           | -540 bp                       |
|                 |               |                                                      | TTCTAGAA                                                                           | -272 bp                       |
| <i>ZK1053.4</i> | ZK1053.4      | SEPA-1-like <sup>2</sup>                             | ATCTAGAA                                                                           | -1473 bp                      |
|                 |               |                                                      | GTCTAGAA                                                                           | -1391 bp                      |

**Supplementary Table 8:** Putative heat shock elements (HSE) in promoter regions of *C. elegans* autophagy-related genes (i.e., in the 2000 base pairs [bp] upstream of the start codon). The *C. elegans* HSE motif profile (Ref <sup>1</sup>) was identified using JASPAR. <sup>2</sup>: selective turnover of P granules.

**Supplementary Table 9: Thermorecovery analyses of *hlh-30* mutants after hormetic heat shock.**

| Exp            | Strain                | Heat shock conditions               | Control              |     |                 | Heat shock and 0-hour Recovery |     | P value (CTRL vs HS) |
|----------------|-----------------------|-------------------------------------|----------------------|-----|-----------------|--------------------------------|-----|----------------------|
|                |                       |                                     | % alive $\pm$ s.e.m. | N   | P value (vs WT) | % alive $\pm$ s.e.m.           | N   |                      |
| 2              | WT                    | HS: 30 min, 36°C, d1<br>TR: d3, 8 h | 88 $\pm$ 3           | 96  |                 | 95 $\pm$ 2                     | 110 | ns                   |
|                | <i>hlh-30(tm1978)</i> |                                     | 8 $\pm$ 2            | 115 | ****            | 20 $\pm$ 3                     | 99  | *                    |
| 3 <sup>1</sup> | WT                    | HS: 30 min, 36°C, d1<br>TR: d3, 8 h | 12 $\pm$ 4           | 101 |                 | 39 $\pm$ 4                     | 112 | **                   |
|                | <i>hlh-30(tm1978)</i> |                                     | 6 $\pm$ 3            | 106 | ns              | 10 $\pm$ 2                     | 93  | ns                   |
| 4              | WT                    | HS: 30 min, 36°C, d1<br>TR: d3, 8 h | 44 $\pm$ 4           | 140 |                 | 67 $\pm$ 3                     | 114 | ***                  |
|                | <i>hlh-30(tm1978)</i> |                                     | 8 $\pm$ 2            | 115 | ****            | 11 $\pm$ 2                     | 114 | ns                   |
| 5              | WT                    | HS: 30 min, 36°C, d1<br>TR: d4, 8 h | 48 $\pm$ 5           | 131 |                 | 64 $\pm$ 2                     | 141 | *                    |
|                | <i>hlh-30(tm1978)</i> |                                     | 24 $\pm$ 5           | 155 | **              | 39 $\pm$ 3                     | 153 | *                    |

**Supplementary Table 9:** Survival analysis of wild-type (WT, N2) and *hlh-30(tm1978)* mutants (JIN1375). Animals were maintained under control conditions or subjected to 30 min of hormetic heat shock (HS: 36°C) on day 1 (d1) of adulthood. Thermorecovery (TR) was tested on the indicated days of adulthood by incubating animals at 36°C for 6–9 h followed by ~20 h of recovery. Exp: experiment number (in chronological order). The mean  $\pm$  s.e.m. percentage survival of experimental and control groups were analyzed by two-way ANOVA. ns:  $P > 0.05$ , \* $P < 0.05$ , \*\* $P < 0.01$ , \*\*\* $P < 0.001$ ; N: number of animals analyzed (see Methods). <sup>1</sup>: data depicted in **Supplementary Fig. 9d**.

**Supplementary Table 10: Lifespan analyses of *hlh-30* mutants after hormetic heat shock.**

| Exp            | Strain                | Control    |         |        |                        | Heat shock |         | CTRL vs HS |                |
|----------------|-----------------------|------------|---------|--------|------------------------|------------|---------|------------|----------------|
|                |                       | MLS (days) | N       | % MLS  | <i>P</i> value (vs WT) | MLS (days) | N       | % MLS      | <i>P</i> value |
| 1              | WT                    | 14.4       | 107/120 |        |                        | 21.4       | 85/121  | +48.6%     | <0.0001        |
|                | <i>hlh-30(tm1978)</i> | 15.3       | 90/122  | +6.3%  | 0.5                    | 15.5       | 85/124  | +1.3%      | 0.5            |
| 2 <sup>1</sup> | WT                    | 17.6       | 124/126 |        |                        | 21.7       | 114/120 | +23.3%     | <0.0001        |
|                | <i>hlh-30(tm1978)</i> | 12.5       | 118/121 | -29.0% | <0.0001                | 11.6       | 115/120 | -7.2%      | 0.33           |
| 3              | WT                    | 15.4       | 125/129 |        |                        | 20.8       | 114/121 | +35.1%     | <0.0001        |
|                | <i>hlh-30(tm1978)</i> | 9.8        | 116/124 | -36.4% | <0.0001                | 11.7       | 117/132 | +19.4%     | 0.0001         |

**Supplementary Table 10:** Lifespan analysis of wild-type (WT, N2) and *hlh-30(tm1978)* (JIN1375) mutants. Animals were maintained under control conditions or subjected to 30 min of hormetic heat shock (HS: 36°C) on day 1 (d1) of adulthood. Exp: experiment number (in chronological order). MLS: mean lifespan; N: observed deaths/total number of animals; % MLS: percentage change in lifespan compared with control; *P*-values calculated by log-rank test. <sup>1</sup>: data depicted in **Supplementary Fig. 9e**.

**Supplementary Table 11: Thermorecovery analyses of animals overexpressing HSF-1.**

| Exp            | Strain   | RNAi               | % alive | N   | P value |
|----------------|----------|--------------------|---------|-----|---------|
| 1              | HSF-1 OE | CTRL (WL)          | 35 ± 6  | 127 |         |
|                | HSF-1 OE | <i>unc-51</i> (WL) | 16 ± 4  | 101 | *       |
|                | HSF-1 OE | <i>atg-18</i> (WL) | 5 ± 2   | 107 | ***     |
|                | HSF-1 OE | <i>bec-1</i> (WL)  | 3 ± 2   | 101 | ***     |
|                | HSF-1 OE | <i>lgg-1</i> (WL)  | 8 ± 3   | 107 | ***     |
|                | WT       | CTRL (WL)          | 6 ± 2   | 122 | ***     |
| 2              | HSF-1 OE | CTRL (WL)          | 54 ± 1  | 113 |         |
|                | HSF-1 OE | <i>unc-51</i> (WL) | 29 ± 7  | 209 | **      |
|                | HSF-1 OE | <i>atg-18</i> (WL) | 24 ± 1  | 137 | **      |
|                | HSF-1 OE | <i>bec-1</i> (WL)  | 34 ± 5  | 220 | *       |
|                | HSF-1 OE | <i>lgg-1</i> (WL)  | 19 ± 5  | 120 | ***     |
|                | WT       | CTRL (WL)          | 30 ± 3  | 130 | **      |
| 3 <sup>1</sup> | HSF-1 OE | CTRL (AO)          | 42 ± 2  | 142 |         |
|                | HSF-1 OE | <i>unc-51</i> (AO) | 26 ± 5  | 100 | *       |
|                | HSF-1 OE | <i>atg-18</i> (AO) | 20 ± 2  | 145 | **      |
|                | HSF-1 OE | <i>bec-1</i> (AO)  | 18 ± 5  | 123 | **      |
|                | HSF-1 OE | <i>lgg-1</i> (AO)  | 23 ± 3  | 154 | *       |
|                | WT       | CTRL (AO)          | 29 ± 7  | 91  | ns      |
| 4              | HSF-1 OE | CTRL (AO)          | 46 ± 3  | 116 |         |
|                | HSF-1 OE | <i>unc-51</i> (AO) | 8 ± 1   | 122 | ****    |
|                | HSF-1 OE | <i>atg-18</i> (AO) | 5 ± 1   | 91  | ****    |
|                | HSF-1 OE | <i>bec-1</i> (AO)  | 17 ± 5  | 123 | ***     |
|                | HSF-1 OE | <i>lgg-1</i> (AO)  | 14 ± 5  | 131 | ***     |
|                | WT       | CTRL (AO)          | 31 ± 4  | 108 | ns      |

**Supplementary Table 11:** Survival analysis of wild-type (N2) and HSF-1–overexpressing (HSF-1 OE) animals (*hsf-1p::hsf-1::gfp*, MAH365) fed control bacteria (empty vector, CTRL) or bacteria expressing dsRNA targeting the indicated autophagy genes from hatching (whole-life RNAi; WL) or from day 1 of adulthood (adult-only RNAi; AO). Animals were incubated at 36°C for 7–8 h on day 3–4 of adulthood followed by recovery for ~20 h. Exp: experiment number (in chronological order). The mean ± s.e.m. percentage survival of experimental and control groups were analyzed using Student's *t*-test or one-way ANOVA. ns:  $P > 0.05$ , \* $P < 0.05$ , \*\* $P < 0.01$ , \*\*\* $P < 0.001$ ; N: number of animals analyzed (see Methods). <sup>1</sup>: data depicted in **Fig. 3b**.

**Supplementary Table 12: Lifespan analyses of animals overexpressing HSF-1.**

| Exp            | RNAi          | Wild-type  |         |        |         | HSF-1 Overexpressor |          |        |         | % MLS  | P value |
|----------------|---------------|------------|---------|--------|---------|---------------------|----------|--------|---------|--------|---------|
|                |               | MLS (days) | N       | % MLS  | P value | MLS (days)          | N        | % MLS  | P value |        |         |
| 1              | CTRL          | 16.9       | 113/121 |        |         | 19.2                | 101/121  |        |         | +13.8% | 0.006   |
|                | <i>atg-18</i> | 14.2       | 110/122 | -15.6% | <0.0001 | 12.2                | 111/124  | -36.7% | <0.0001 |        |         |
| 2              | CTRL          | 16.3       | 104/121 |        |         | 22.9                | 99/123   |        |         | +40.5% | <0.0001 |
|                | <i>atg-18</i> | 13.5       | 100/121 | -17.2% | <0.0001 | 14.7                | 117//125 | -35.8% | <0.0001 |        |         |
|                | <i>atg-13</i> | 18.0       | 112/112 | +10.4% | 0.03    | 15.0                | 111/126  | -34.5% | <0.0001 |        |         |
|                | <i>lgg-1</i>  | 18.4       | 91/120  | +12.9% | 0.04    | 17.4                | 118/128  | -24.0% | <0.0001 |        |         |
| 3              | CTRL          | 16.0       | 93/124  |        |         | 19.4                | 107/148  |        |         | +21.3% | <0.0001 |
|                | <i>lgg-1</i>  | 15.6       | 97/128  | -2.5%  | 0.6     | 15.2                | 164/177  | -24.6% | <0.0001 |        |         |
|                | <i>atg-13</i> | 17.1       | 113/130 | +6.9%  | 0.2     | 16.2                | 147/168  | -17.0% | 0.003   |        |         |
| 4 <sup>1</sup> | CTRL          | 18.1       | 113/130 |        |         | 23.0                | 121/143  |        |         | +27.2% | <0.0001 |
|                | <i>unc-51</i> | 18.3       | 128/138 | +1.5%  | 0.9     | 15.4                | 133/139  | -33.1% | <0.0001 |        |         |
|                | <i>bec-1</i>  | 16.7       | 123/133 | -7.4%  | 0.02    | 16.3                | 140/153  | -29.1% | <0.0001 |        |         |
|                | <i>lgg-1</i>  | 16.7       | 109/142 | -7.6%  | 0.02    | 14.9                | 147/153  | -35.2% | <0.0001 |        |         |

**Supplementary Table 12:** Lifespan analysis of wild-type animals and HSF-1–overexpressing animals *hsf-1p::hsf-1::gfp + rol-6*. Experiment 1 used strain EQ87; all other experiments used MAH365 (MAH365 is EQ87 4x outcrossed to Hansen lab N2). Animals were fed from day 1 of adulthood with control bacteria (empty vector, CTRL) or bacteria expressing dsRNA targeting the indicated autophagy genes. Exp: experiment number (in chronological order). MLS: mean lifespan. N: observed deaths/total number of animals subjected to RNAi. % MLS: percentage change in lifespan compared with control. ns:  $P > 0.05$ , \* $P < 0.05$ , \*\* $P < 0.01$ , \*\*\* $P < 0.001$ , \*\*\*\* $P < 0.0001$  by log-rank test. <sup>1</sup>: data depicted in **Fig. 3f–h**.

**Supplementary Table 13: Lifespan analyses of PolyQ-expressing animals after hormetic heat shock.**

| Exp | Strain                                | Control    |         |        |                 | Heat shock |         | CTRL vs HS |         |
|-----|---------------------------------------|------------|---------|--------|-----------------|------------|---------|------------|---------|
|     |                                       | MLS (days) | N       | % MLS  | P value (vs WT) | MLS (days) | N       | % MLS      | P value |
| 1   | <i>vha-6p::Q44::yfp</i>               | 16.8       | 107/127 |        |                 | 18.5       | 108/134 | +10.1%     | 0.004   |
| 2   | WT                                    | 17.2       | 122/127 |        |                 | 21.2       | 105/126 | +23.3%     | <0.0001 |
|     | <i>vha-6p::Q44::yfp</i> <sup>1</sup>  | 15.2       | 134/151 | -11.6% | 0.07            | 19.3       | 115/124 | +27.0%     | <0.0001 |
|     | <i>rgef-1p::Q40::yfp</i>              | 11.9       | 115/125 | -30.8% | <0.0001         | 15.4       | 98/124  | +29.4%     | <0.0001 |
| 3   | WT                                    | 15.4       | 111/123 |        |                 | 17.5       | 102/120 | +13.6%     | 0.0006  |
|     | <i>vha-6p::Q44::yfp</i>               | 14.0       | 133/135 | -9.1%  | 0.005           | 18.1       | 104/139 | +29.3%     | <0.001  |
|     | <i>rgef-1p::Q40::yfp</i> <sup>2</sup> | 9.4        | 118/130 | -39.0% | <0.0001         | 12.4       | 94/124  | +31.9%     | 0.0001  |
| 4   | WT                                    | 16.4       | 129/130 |        |                 | 20.2       | 119/123 | +23.2%     | <0.0001 |
|     | <i>vha-6p::Q44::yfp</i>               | 14.7       | 129/130 | -10.4% | 0.003           | 18.2       | 119/128 | +23.8%     | <0.0001 |
|     | <i>rgef-1p::Q40::yfp</i> <sup>4</sup> | 9.2        | 112/127 | -43.9% | <0.0001         | 15.5       | 79/127  | +68.5%     | <0.0001 |

**Supplementary Table 13:** Lifespan analysis of wild-type and the indicated mutant and transgenic animals maintained under control conditions or subjected to hormetic heat shock (HS: 36°C) for 30 min on day 1 of adulthood. MLS: mean lifespan; N: observed deaths/total number of animals; % MLS: percentage change in lifespan compared with control. *P*-values calculated by log-rank test. <sup>1</sup>: data depicted in **Fig. 4e**; <sup>2</sup>: data depicted in **Supplementary Fig. 13c**.

**Supplementary Table 14: *C. elegans* strains used in this study.**

| Published strains used in this study |                                                                                             |                                                                                                                                                                                                                        |
|--------------------------------------|---------------------------------------------------------------------------------------------|------------------------------------------------------------------------------------------------------------------------------------------------------------------------------------------------------------------------|
| Name                                 | Genotype                                                                                    | Strain origin                                                                                                                                                                                                          |
| N2                                   | Wild-type (WT)                                                                              | Hansen lab, originated from Kenyon lab                                                                                                                                                                                 |
| AM101                                | <i>rmls110[rgef-1p::polyQ40::YFP]</i>                                                       | Morimoto lab)                                                                                                                                                                                                          |
| AM446                                | <i>rmls223[C12C8.1p::GFP; rol-6(su1006)]</i>                                                | Morimoto lab                                                                                                                                                                                                           |
| BC13209                              | <i>dpy-5(e907) I; sEx13209 [atg-18p::GFP + dpy-5(+)]</i>                                    | Baillie lab                                                                                                                                                                                                            |
| CB1301                               | <i>unc-54(e1301) I (ts)</i>                                                                 | CGC                                                                                                                                                                                                                    |
| CB1402                               | <i>unc-15(e1402) I (ts)</i>                                                                 | CGC                                                                                                                                                                                                                    |
| CF1553                               | <i>muls84[sod-3p::gfp]</i>                                                                  | Kenyon lab                                                                                                                                                                                                             |
| CL2166                               | <i>dvls19[gst-4p::gfp::NLS] III</i>                                                         | CGC                                                                                                                                                                                                                    |
| CX51                                 | <i>dyn-1(ky51) X (ts)</i>                                                                   | CGC                                                                                                                                                                                                                    |
| DA2123                               | <i>adls2122[lgg-1p::gfp::lgg-1 + rol-6(su1006)]</i>                                         | Avery lab                                                                                                                                                                                                              |
| DG718                                | <i>Ex[let-858p::hsf-1 + rol-6(su1006)]</i>                                                  | Gidalevitz lab                                                                                                                                                                                                         |
| EQ87                                 | <i>iqIs28[hsf-1p::hsf-1::gfp + rol-6(su1006)]</i>                                           | Hsu lab                                                                                                                                                                                                                |
| GF80                                 | <i>dgEx80[vha-6p::Q44::yfp + rol-6(su1006)]</i>                                             | CGC                                                                                                                                                                                                                    |
| HZ1330                               | <i>bpEx50(atg-16.2p::gfp + unc-76)</i>                                                      | Zhang lab                                                                                                                                                                                                              |
| JIN1375                              | <i>hlh-30(tm1978) IV</i>                                                                    | Irazoqui lab                                                                                                                                                                                                           |
| LD1171                               | <i>ldIs3[gcs-1p::gfp + rol-6(su1006)]</i>                                                   | CGC                                                                                                                                                                                                                    |
| MAH235                               | <i>sqs19[hlh-30p::hlh-30::gfp + rol-6(su1006)]</i>                                          | Hansen lab                                                                                                                                                                                                             |
| MAH236                               | <i>sqs13[lgg-1p::gfp::lgg-1 + odr-1p::rfp]</i>                                              | Hansen lab                                                                                                                                                                                                             |
| MAH242                               | <i>sqs24[rgef-1p::gfp::lgg-1 + unc-122p::rfp]</i>                                           | Hansen lab                                                                                                                                                                                                             |
| RD202                                | <i>unc-119(ed3) III; ppls??[unc-119(+); lgg-1p::gfp::lgg-1(G116A)]</i>                      | Legouis lab                                                                                                                                                                                                            |
| SD551                                | <i>let-60(ga89) IV (ts)</i>                                                                 | CGC                                                                                                                                                                                                                    |
| SJ4005                               | <i>zcls4[hsp-4p::gfp] V</i>                                                                 | CGC                                                                                                                                                                                                                    |
| SJ4100                               | <i>lszc13[hsp-6p::gfp]</i>                                                                  | CGC                                                                                                                                                                                                                    |
| TJ375                                | <i>gpls1[hsp-16.2p::gfp]</i>                                                                | CGC                                                                                                                                                                                                                    |
| Strains generated in this study      |                                                                                             |                                                                                                                                                                                                                        |
| Name                                 | Genotype                                                                                    | Comments                                                                                                                                                                                                               |
| MAH215                               | <i>sqs11[lgg-1p::mcherry::gfp::lgg-1 + rol-6(su1006)]</i>                                   | Microinjection of pMH878 ( <i>lgg-1p::mcherry::gfp::lgg-1</i> ) plus pRF4 ( <i>rol-6</i> ) into N2 (to generate MAH167). Gamma-irradiation of MAH167, and 4x outcrossed to N2. Chang JT et al., manuscript in revision |
| MAH325                               | <i>dpy-5(e907) I/?; sls10729[sqst-1p::GFP + dpy-5(+)]</i>                                   | BC12921 4x outcrossed to N2                                                                                                                                                                                            |
| MAH365                               | <i>iqIs28[hsf-1p::hsf-1::gfp + rol-6(su1006)]</i>                                           | EQ87 4x outcrossed to N2                                                                                                                                                                                               |
| MAH471                               | <i>unc-15(e1402) I (ts)</i>                                                                 | CB1402 4x outcrossed to N2                                                                                                                                                                                             |
| MAH477                               | <i>dyn-1(ky51) X (ts)</i>                                                                   | CX51 4x outcrossed to N2                                                                                                                                                                                               |
| MAH478                               | <i>let-60(ga89) IV (ts)</i>                                                                 | SD551 4x outcrossed to N2                                                                                                                                                                                              |
| MAH534                               | <i>sqs13[lgg-1p::gfp::lgg-1 + odr-1p::rfp]; Ex[let-858p::hsf-1 + rol-6(su1006)]</i>         | MAH236 x DG718                                                                                                                                                                                                         |
| MAH552                               | <i>sqs24[rgef-1p::gfp::lgg-1 + unc-122p::rfp]; Ex[let-858p::hsf-1 + rol-6(su1006)]</i>      | MAH242 x DG718                                                                                                                                                                                                         |
| MAH575                               | <i>iqIs28[hsf-1p::hsf-1::gfp + rol-6(su1006)]; dgEx80[vha-6p::Q44::YFP + rol-6(su1006)]</i> | GF80 x MAH365                                                                                                                                                                                                          |
| MAH602                               | <i>sqs61[vha-6p::Q44::YFP + rol-6(su1006)]</i>                                              | Gamma-irradiation of GF80 and 6x outcrossed to N2                                                                                                                                                                      |

**Supplementary Table 15: Sequences of quantitative RT-PCR primers used in this study.**

| Gene                      | Primer sequence 5' → 3' |                                                 |
|---------------------------|-------------------------|-------------------------------------------------|
| <b>Experimental genes</b> |                         |                                                 |
| <i>unc-51</i>             | Fwd                     | ACA AAT CCC TGT CGT TCC AG                      |
|                           | Rev                     | AAT GAG CCG TTG GAT AAT GC                      |
| <i>atg-9</i>              | Fwd                     | GGC CGC CAT CCA CTC ATC GG                      |
|                           | Rev                     | GGC CGC CAT CCA CTC ATC GG                      |
| <i>atg-18</i>             | Fwd                     | AAA TGG ACA TCG GCT CTT TG                      |
|                           | Rev                     | TGA TAG CAT CGA ACC ATC CA                      |
| <i>bec-1</i>              | Fwd                     | TCGAGCTCCCACTCTTTGGCG                           |
|                           | Rev                     | TGA CAC CAT TGT CAA CCA GTG                     |
| <i>lgg-1</i>              | Fwd                     | ACC CAG ACC GTA TTC CAG TG                      |
|                           | Rev                     | ACG AAG TTG GAT GCG TTT TC                      |
| <i>sqst-1</i>             | Fwd                     | TGG CTG CTG CAT CAT CCG CT                      |
|                           | Rev                     | TCA ATC GTG CCG AGA CCG GG                      |
| <i>vps-11</i>             | Fwd                     | TCC GCT TGT CGT CCT GGA GC                      |
|                           | Rev                     | TCA CAC GCC GAG CAC TTG GT                      |
| <i>Imp-1</i>              | Fwd                     | ATCCGCCACCGCTTCGCATT                            |
|                           | Rev                     | TCGAGCTCCCACTCTTTGGCG                           |
| <i>vha-15</i>             | Fwd                     | CGA GGT TCG TTC CGG ACG TCT T                   |
|                           | Rev                     | CCT CGG CAG TCA GGA GAC GC                      |
| <i>vha-16</i>             | Fwd                     | AGG CGC TGA CTC GCG GAC TT                      |
|                           | Rev                     | TGG TCT CTG GTG AAG AGT TCC GGT G               |
| <i>hsp-70 (C12C8.1)</i>   | Fwd                     | ACT CAT GTG TCG GTA TTT ATC                     |
|                           | Rev                     | ACG GGC TTT CCT TGT TTT                         |
| <i>hsp-16.1</i>           | Fwd                     | GTC ACT TTA CCA CTA TTT CCG TCC AGC TCA ACG TTC |
|                           | Rev                     | CAA CGG GCG CTT GCT GAA TTG GAA TAG ATC TTC C   |
| <i>hsp-16.2</i>           | Fwd                     | ACT TTA CCA CTA TTT CCG TCC AGC                 |
|                           | Rev                     | CCT TGA ACC GCT TCT TTC TTT G                   |
| <i>aip-1</i>              | Fwd                     | GGC GGA GTT CCC AAA TCT CGG AAA GCA CTG TG      |
|                           | Rev                     | GGT GCA GTT GGA ATT GGA ATT TCT TGT TTG ATG C   |
| <i>gst-4</i>              | Fwd                     | CTC AAT GTG CCT TAC GAG G                       |
|                           | Rev                     | CGA ATT GTT CTC CAT CGA CTT G                   |
| <i>gcs-1</i>              | Fwd                     | GTC GAT TGA TGA GAT TAT CAA TGG                 |
|                           | Rev                     | CAA AGT ATT AAT CTC TCC AGT TGC                 |
| <i>sod-3</i>              | Fwd                     | GCA TCA TGC CAC CTA CGT G                       |
|                           | Rev                     | CTG GTT GGA GAG CAA TTG CTT C                   |
| <i>hsp-6</i>              | Fwd                     | GAC GCT AAT GGT ATC GTG                         |
|                           | Rev                     | GAT AAC CTC GAC GAG CTC                         |
| <i>hsp-3</i>              | Fwd                     | GAC CAA GTA TGG AAC CAT TAT TG                  |
|                           | Rev                     | GAG AAA GCA ACG TAG GAT G                       |
| <i>hlh-30</i>             | Fwd                     | CTC ATC GGC CGG CGC TCA TC                      |
|                           | Rev                     | AGA ACG CGA TGC GTG GTG GG                      |

**(Supplementary Table 15 continued)**



| Gene                      | Primer sequence 5' → 3' |                            |
|---------------------------|-------------------------|----------------------------|
| <b>Experimental genes</b> |                         |                            |
| <i>ama-1</i>              | Fwd                     | TGG AAC TCT GGA GTC ACA CC |
|                           | Rev                     | CAT CCT CCT TCA TTG AAC GG |
| <i>pmp-3</i>              | Fwd                     | GTTCCCGTGTTCACTCAT         |
|                           | Rev                     | ACACCGTCGAGAAGCTGTAGA      |
| <i>cdc-42</i>             | Fwd                     | CTGCTGGACAGGAAGATTACG      |
|                           | Rev                     | CTCGGACATTCTCGAATGAAG      |
| <i>nhr-23</i>             | Fwd                     | CAG AAA CAC TGA AGA ACG CG |
|                           | Rev                     | CGA TCT GCA GTG AAT AGC TC |

### 3. Supplementary References

1. GuhaThakurta, D. et al. Identification of a novel cis-regulatory element involved in the heat shock response in *Caenorhabditis elegans* using microarray gene expression and computational methods. *Genome Research* 12, 701–12 (2002).
